# Supplementary material for: Catalytic synthesis of renewable lubricant base oils with methyl oleate and aromatics
Source: Royal Society of Chemistry journal article supplement (doi:10.1039/d4gc03448a), 2024-01-01
Supplement: d4gc03448a1.pdf [file d4gc03448a1.pdf]

## Supporting Information

### **Catalytic synthesis of renewable lubricant base oils with methyl oleate and aromatics**

Binbin Zhou<sup>1</sup>, Nan Wang<sup>1</sup>, Sibao Liu<sup>2\*</sup>, Guozhu Liu<sup>1,3\*</sup>

<sup>1</sup>Key Laboratory for Green Chemical Technology of Ministry of Education, School of Chemical Engineering and Technology, Tianjin, 300072, China

<sup>2</sup>Engineering Research Center of Polymer Green Recycling of Ministry of Education, Fujian Key Laboratory of Pollution Control & Resource Reuse, College of Environmental and Resources, Fujian Normal University, Fuzhou, Fujian, 350007, China

<sup>3</sup>Haihe Lab of Sustainable Chemical Transformations, Tianjin, 300192, China

\*Corresponding authors: liusibao@fjnu.edu.cn (Sibao Liu), gliu@tju.edu.cn (Guozhu Liu)



### Strategy 3

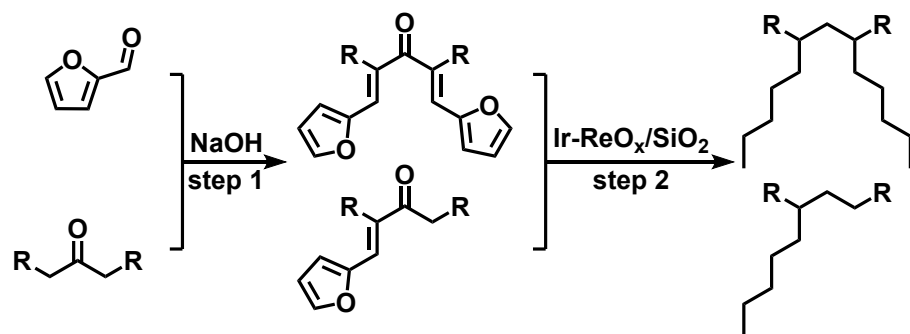

### Strategy 4

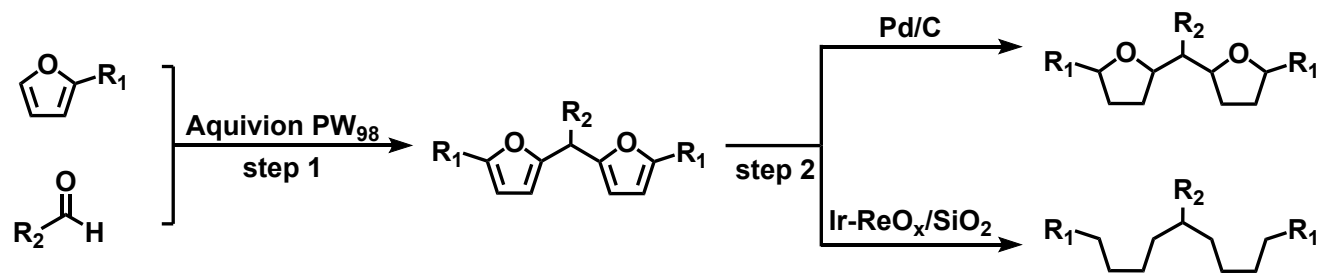

### Strategy 5

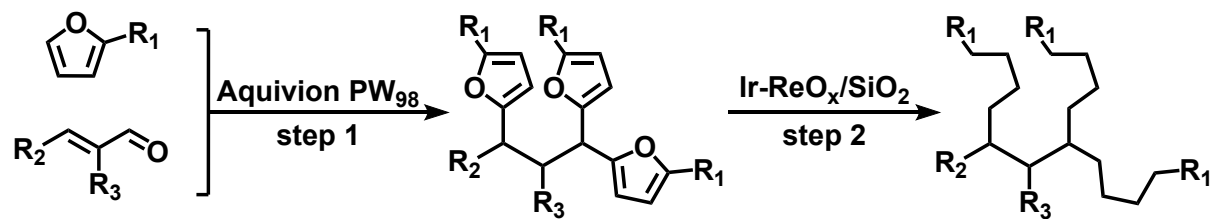

### Strategy 6

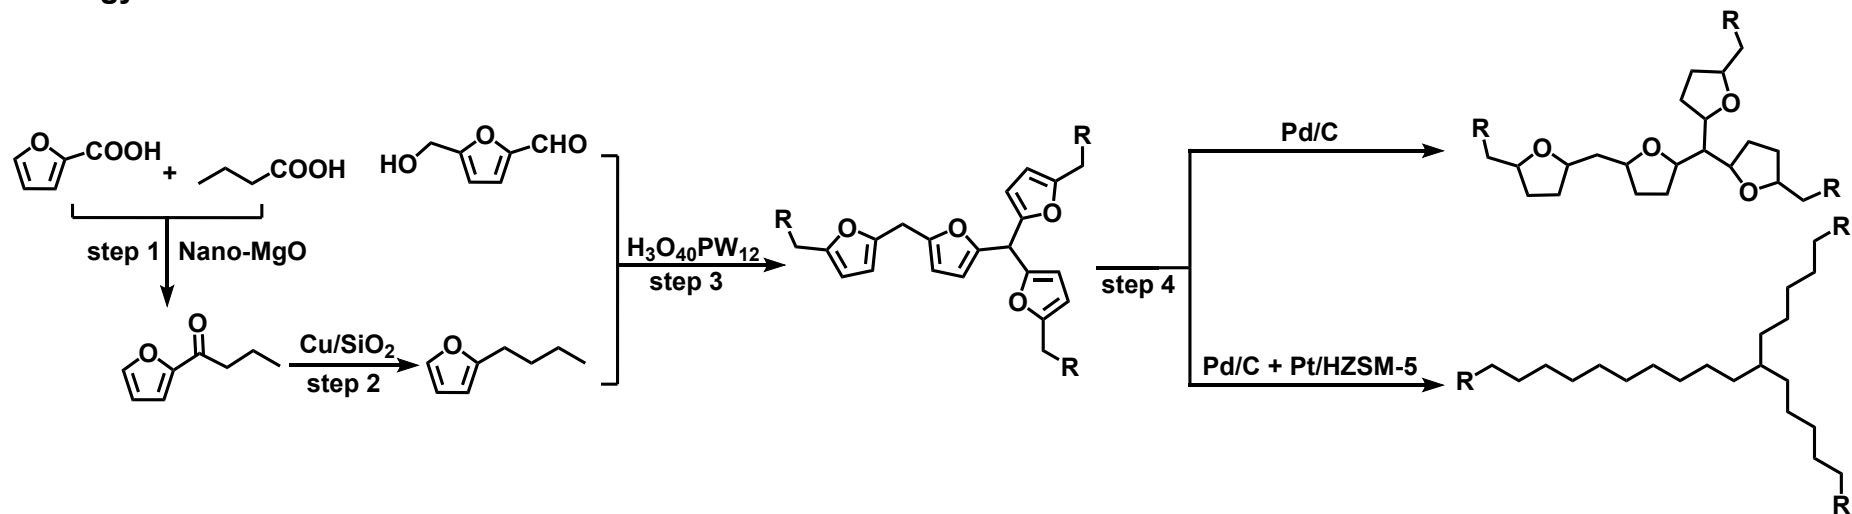

### Strategy 7

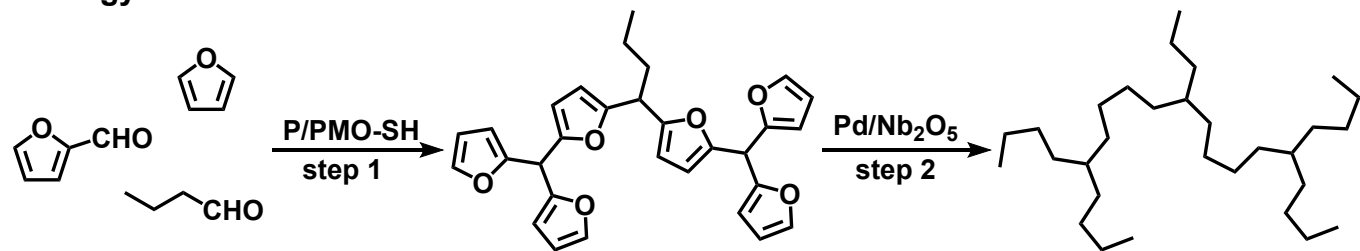

### Strategy 8

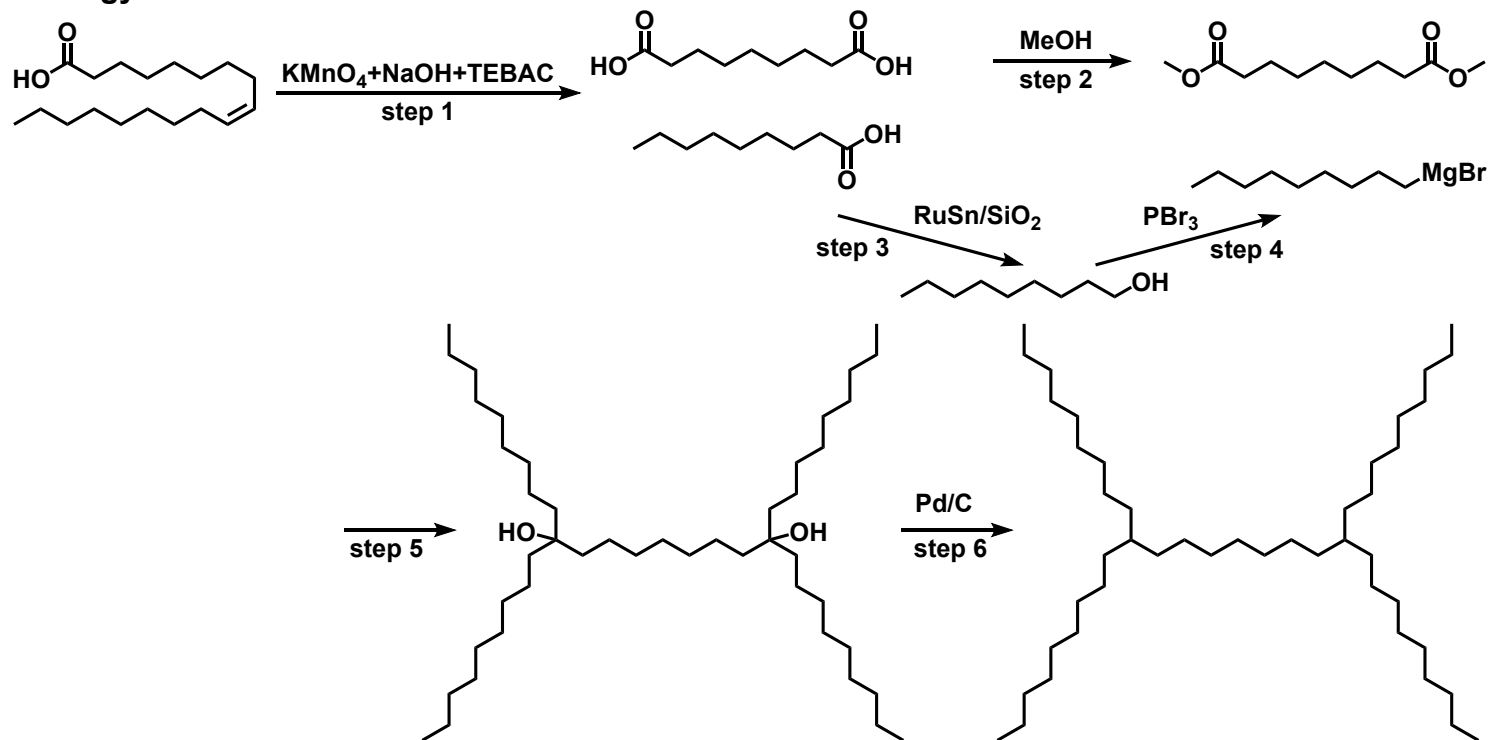

### Strategy 9

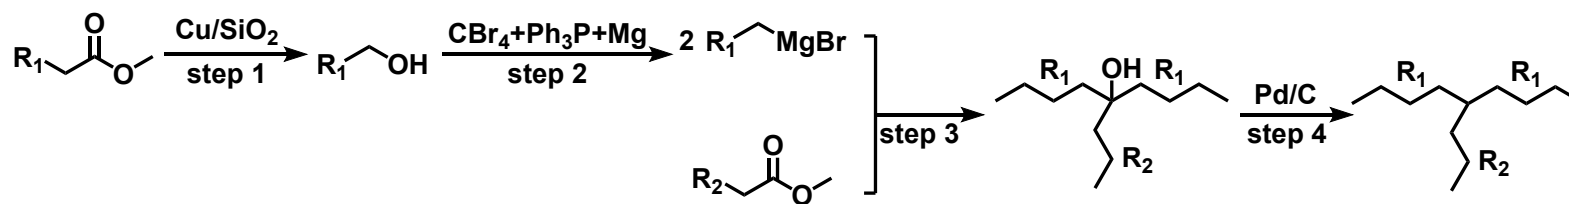

### Strategy 10

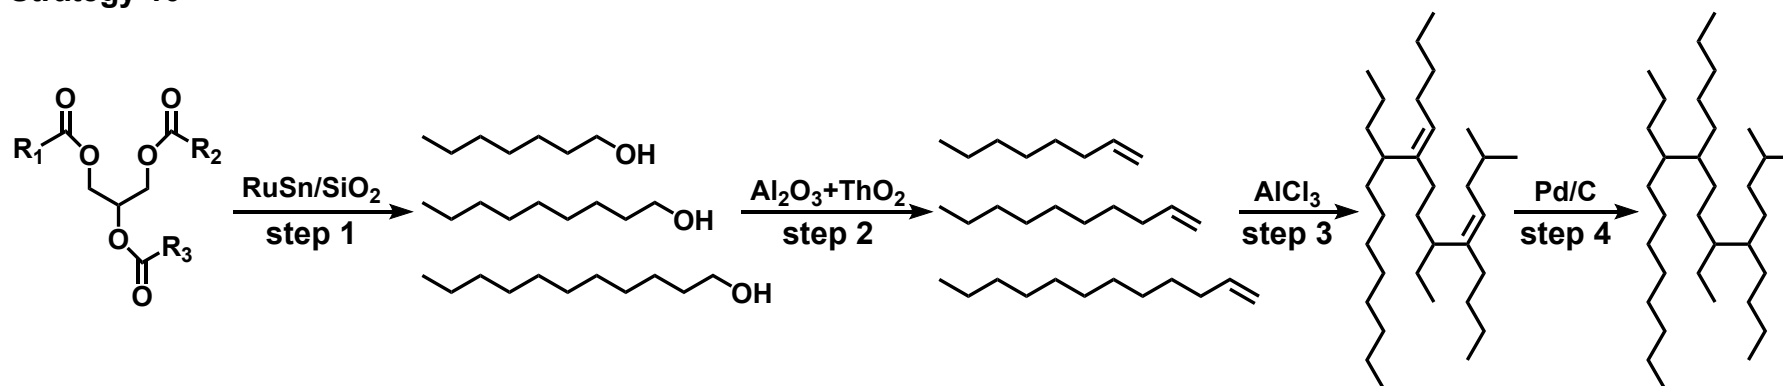

### Strategy 11

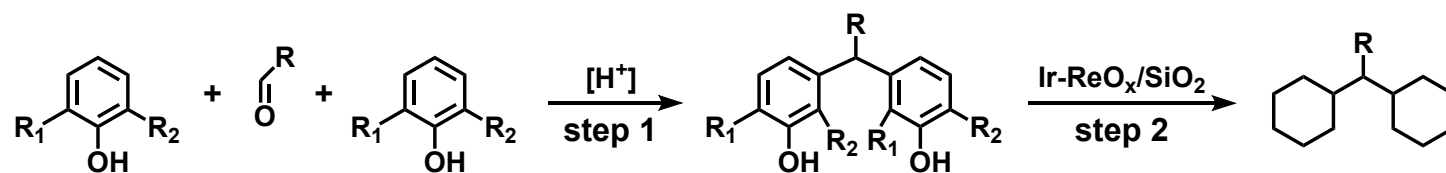

### Strategy 12 (This work)

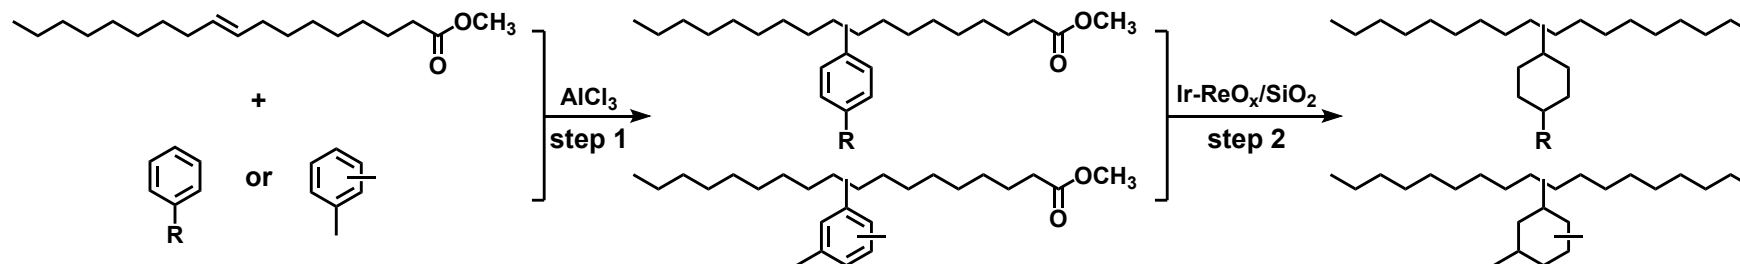

**Scheme S1** The strategies for the synthesis of alkane-based lubricant base oils from biomass

**Table S1** The comparisons of the synthesis of alkane-based lubricant base oils from biomass with different strategies (Scheme S1)

| Strategy | The number of steps | Reagents                                | Reaction conditions                                                                                                                                                                              | Overall yield / % | References                                                                                                                                              |
|----------|---------------------|-----------------------------------------|--------------------------------------------------------------------------------------------------------------------------------------------------------------------------------------------------|-------------------|---------------------------------------------------------------------------------------------------------------------------------------------------------|
| 1        | 4                   | acetone and furfural                    | Step 1: 40 °C, 5 h, Yield: 97%;<br>Step 2: 130 °C, 5 h, 5 MPa H <sub>2</sub> , Yield: 72.8%;<br>Step 3: 50 °C, 20 h, Yield: 83.8%;<br>Step 4: 175 °C, 24 h, 5 MPa H <sub>2</sub> , Yield: 75.5%. | 44.7              | M. Gu, Q. Xia, X. Liu, Y. Guo and Y. Wang, <i>ChemSusChem</i> , 2017, <b>10</b> , 4102-4108.                                                            |
| 2        | 2                   | methyl ketones                          | Step 1: 160 °C, 3 h, Yield: 98%;<br>Step 2: 160 °C, 6 h, 3.5 MPa H <sub>2</sub> , Yield: 98%.                                                                                                    | 96                | M. Balakrishnan, G. E. Arab, O. B. Kunbargi, A. A. Gokhale, A. M. Grippo, F. D. Toste and A. T. Bell, <i>Green Chem.</i> , 2016, <b>18</b> , 3577-3581. |
| 3        | 2                   | furfural and 12-tricosanone             | Step 1: 80 °C, 8 h, Yield: 94.3%;<br>Step 2: 180 °C, 18 h, 5 MPa H <sub>2</sub> , Yield: 61.4%.                                                                                                  | 57.9              | A. M. Norton, S. Liu, B. Saha and D. G. Vlachos, <i>ChemSusChem</i> , 2019, <b>12</b> , 4780-4785.                                                      |
| 4        | 2                   | 2-pentylfuran and lauraldehyde          | Step 1: 65 °C, 6 h, Yield: 90%;<br>Step 2: 170 °C, 12 h, 5 MPa H <sub>2</sub> , Yield: 92%.                                                                                                      | 82.8              | S. Liu, B. Saha and D. G. Vlachos, <i>Sci. Adv.</i> , 2019, <b>5</b> , eaav5487.                                                                        |
| 5        | 2                   | 2-pentylfuran and crotonaldehyde        | Step 1: 65 °C, 2 h, Yield: 72%;<br>Step 2: 180 °C, 18 h, 5 MPa H <sub>2</sub> Yield: 88%.                                                                                                        | 63.4              | S. Liu, B. Saha and D. G. Vlachos, <i>Green Chem.</i> , 2019, <b>21</b> , 3606-3614.                                                                    |
| 6        | 2                   | furan, furfural, and aliphatic aldehyde | Step 1: 100 °C, 12 h, Yield: 82%;<br>Step 2: 230 °C, 3 h, Yield: 80%.                                                                                                                            | 65.6              | Y. Liu, S. Chen, Z. Gao, J. Tian, B. Ma and C. Zhao, <i>ACS Sustain. Chem. Eng.</i> , 2024, <b>12</b> , 3167-3174.                                      |

|    |   |                                        |                                                                                                                                                                                                                                                                                                                                                                         |             |                                                                                                         |
|----|---|----------------------------------------|-------------------------------------------------------------------------------------------------------------------------------------------------------------------------------------------------------------------------------------------------------------------------------------------------------------------------------------------------------------------------|-------------|---------------------------------------------------------------------------------------------------------|
| 7  | 4 | hexanoic acid, furoic acid and HMF     | Step 1: 260 °C, 6 h, Yield: 82.2%;<br>Step 2: 220 °C, 3 h, 2 MPa H <sub>2</sub> , Yield: 96.5%;<br>Step 3: 60 °C, 12 h, Yield: 91-93%;<br>Step 4: 260 °C, 10 h, 5 MPa H <sub>2</sub> , Yield: 98%.                                                                                                                                                                      | 70.7        | S. Chen and C. Zhao, <i>ACS Sustain. Chem. Eng.</i> , 2021, <b>9</b> , 10818-10826.                     |
| 8  | 6 | oleic acid                             | Step 1: 50 °C, 8 h, Yield <sub>nonanoic acid</sub> : 81%,<br>Yield <sub>azelaic acid</sub> : 96%;<br>Step 2: 120 °C, 3 h, Yield: 100%;<br>Step 3: 250 °C, 3 h, 4 MPa H <sub>2</sub> , Yield: 96.9%;<br>Step 4: 0 °C, 2h, 25 °C, 4h, Yield: 75.3%;<br>Step 5: 250 °C, 3 h, 4 MPa H <sub>2</sub> , Yield: 85%;<br>Step 6: 250 °C, 3 h, 4 MPa H <sub>2</sub> , Yield: 75%. | 37.7        | S. Chen, T. Wu and C. Zhao, <i>ChemSusChem</i> , 2020, <b>13</b> , 5516-5522.                           |
| 9  | 4 | fatty acid methyl esters               | Step 1: 240 °C, 4 h, Yield: 82%;<br>Step 2: 50 °C, 3 h, Yield: 99%;<br>Step 3: 0 °C, 5 h, Yield: 82.1%;<br>Step 4: 250 °C, 3 h, 1 MPa H <sub>2</sub> , Yield: 100%.                                                                                                                                                                                                     | 67.3        | S. Chen, T. Wu, Y. Fang and C. Zhao, <i>Renew. Energy</i> , 2022, <b>186</b> , 280-287.                 |
| 10 | 4 | lipids                                 | Step 1: 300 °C, 6 h, 5 MPa H <sub>2</sub> , Yield: 99%;<br>Step 2: 300 °C, 6 h, Yield: 90%;<br>Step 3: 120 °C, 4 h, Yield: 95%;<br>Step 4: 250 °C, 3 h, 4 MPa H <sub>2</sub> , Yield: 100%.                                                                                                                                                                             | 84.6        | S. Chen, T. Wu and C. Zhao, <i>Green Chem.</i> , 2020, <b>22</b> , 7348-7354.                           |
| 11 | 2 | guaiacol and lauryl aldehyde           | Step 1: 150 °C, 12 h, Yield: 76%;<br>Step 2: 200 °C, 12 h, 5MPa H <sub>2</sub> , Yield: 82%.                                                                                                                                                                                                                                                                            | 62.3        | E. O. Ebikade, S. Sadula, S. Liu and D. G. Vlachos, <i>Green Chem.</i> , 2021, <b>23</b> , 10090-10100. |
| 12 | 2 | <b>methyl oleate and bio-aromatics</b> | <b>Step 1: 60 °C, 1 h, Yield: 99%;<br/>Step 2: 180 °C, 12 h, 4 MPa H<sub>2</sub>, Yield: 96.3%.</b>                                                                                                                                                                                                                                                                     | <b>96.3</b> | <b>This Work</b>                                                                                        |

---



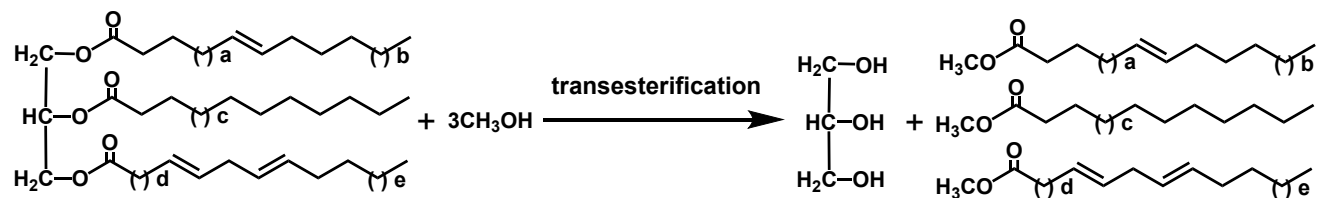

**Scheme S2** Approaches to the synthesis of methyl oleate via transesterification of lipids with methanol.

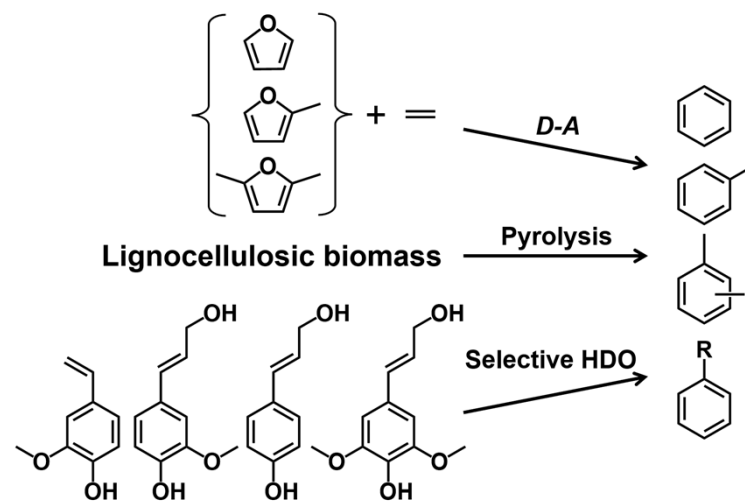

**Scheme S3** Approaches to the synthesis of bio-aromatics from lignocellulosic, furan compounds and lignin monomer.

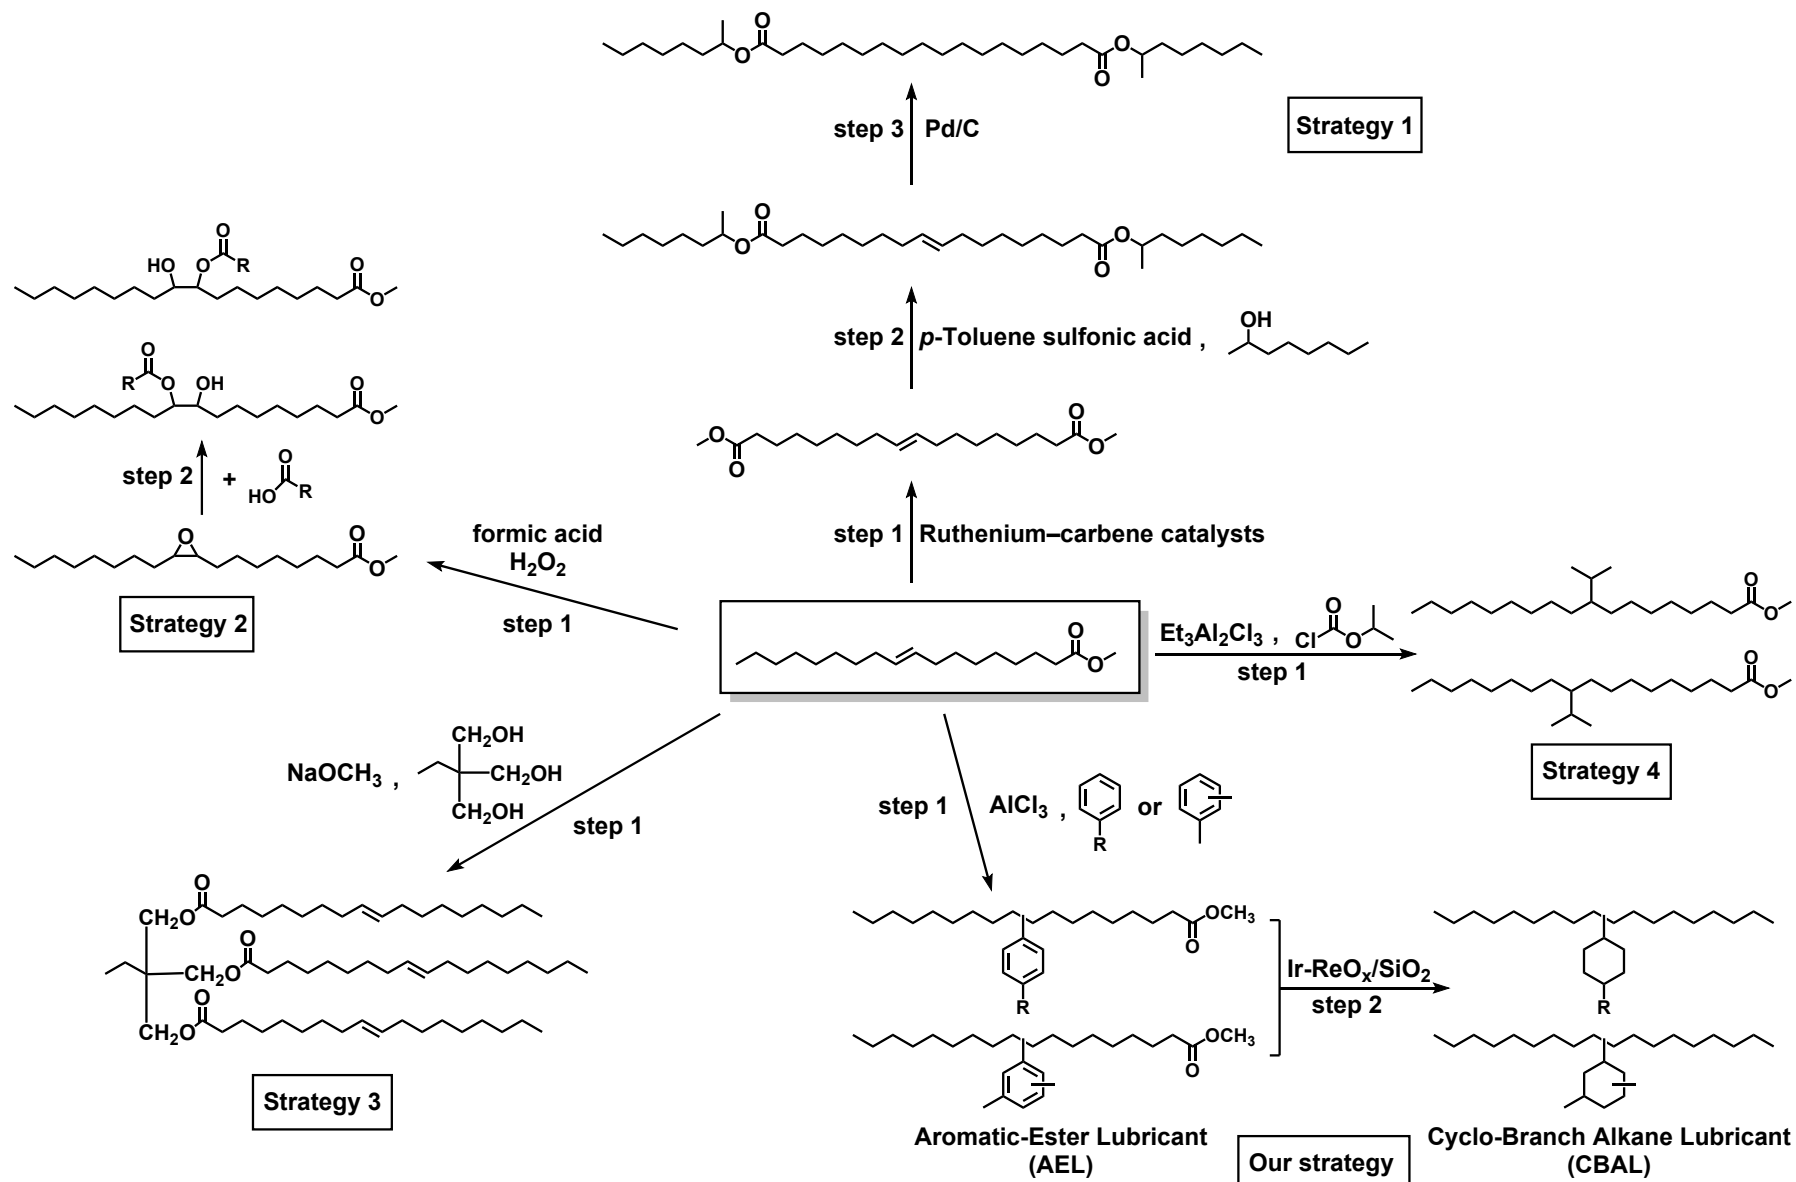

**Scheme S4** Strategies for the synthesis of bio-lubricants with methyl oleate.

**Table S2** The comparisons of the synthesis of bio-lubricant base oils from methyl oleate with different strategies (Scheme S4)

| Strategy | The number of steps | Reagents                                  | Reaction conditions                                                                            | Overall yield / % | References                                                                                                                                                          |
|----------|---------------------|-------------------------------------------|------------------------------------------------------------------------------------------------|-------------------|---------------------------------------------------------------------------------------------------------------------------------------------------------------------|
| 1        | 3                   | methyl oleate and 2-octanol               | Step 1: 110 °C, 2h;<br>Step 2: 100 °C, 2-12 h;<br>Step 3: room temperature, overnight, 2-12 h. | 68.4              | J.-L. Dubois, J.-L. Couturier, S. J. Asadauskas, L. Labanauskas, D. Bražinskienė and R. Blaauw, <i>RSC Adv.</i> , 2021, <b>11</b> , 31030-31041.                    |
| 2        | 2                   | methyl oleate and organic acids           | Step 1: room temperature, 5 h;<br>Step 2: 100 °C, 7 h.                                         | 80.0              | K. M. Doll, B. K. Sharma and S. Z. Erhan, <i>Ind. Eng. Chem. Res.</i> , 2007, <b>46</b> , 3513-3519.                                                                |
| 3        | 1                   | methyl oleate and trimethylolpropane      | Step 1: 2 h, 130 °C.                                                                           | 79.7              | M. S. Elmelawy, A. El-Meligy, H. A. Mawgoud, A. S. Morshedy, S. A. Hanafy and I. E.-t. El-sayed, <i>Biomass Convers. Biorefinery</i> , 2021, <b>13</b> , 1645-1657. |
| 4        | 1                   | methyl oleate and isopropyl chloroformate | Step 1: 1 h, 15 °C.                                                                            | 71                | U. Biermann and J. O. Metzger, <i>J. Am. Chem. Soc.</i> , 2004, <b>126</b> , 10319-10330.                                                                           |
| 5        | 1                   | <b>methyl oleate and bio-aromatics</b>    | <b>Step 1: 60 °C, 1 h.</b>                                                                     | <b>99</b>         | <b>This Work</b>                                                                                                                                                    |
| 6        | 2                   | <b>methyl oleate and bio-aromatics</b>    | <b>Step 1: 60 °C, 1 h;<br/>Step 2: 180 °C, 12 h, 4 MPa H<sub>2</sub>.</b>                      | <b>91.1</b>       | <b>This Work</b>                                                                                                                                                    |

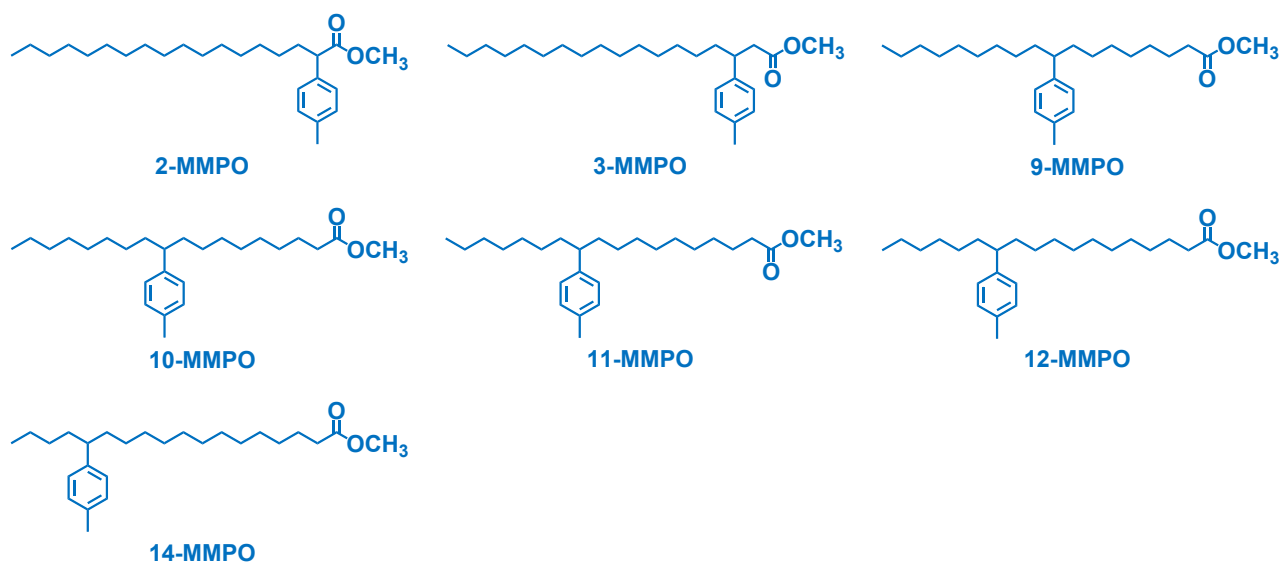

**Fig. S1** The observed isomers of methyl (methylphenyl) octadecanoate (MMPO) in the alkylation step

**Table S3 Effects of reaction time on the alkylation of methyl oleate over AlCl<sub>3</sub>.**

| <b>Entry</b> | <b>Time / h</b> | <b>Con. / %</b> | <b>Yield / %</b> | <b>C.B. / %</b> |
|--------------|-----------------|-----------------|------------------|-----------------|
| 1            | 0.25            | 99.9            | 97.4             | 98.4            |
| 2            | 1               | 99.9            | 99.0             | 99.9            |
| 3            | 2               | 99.9            | 96.2             | 97.2            |
| 4            | 3               | 99.9            | 98.7             | 99.7            |
| 5            | 4               | 99.9            | 99.9             | 99.9            |

Reaction condition: AlCl<sub>3</sub> (3.75 mmol), methyl oleate (3 mmol), toluene (48 mmol), 60 °C.

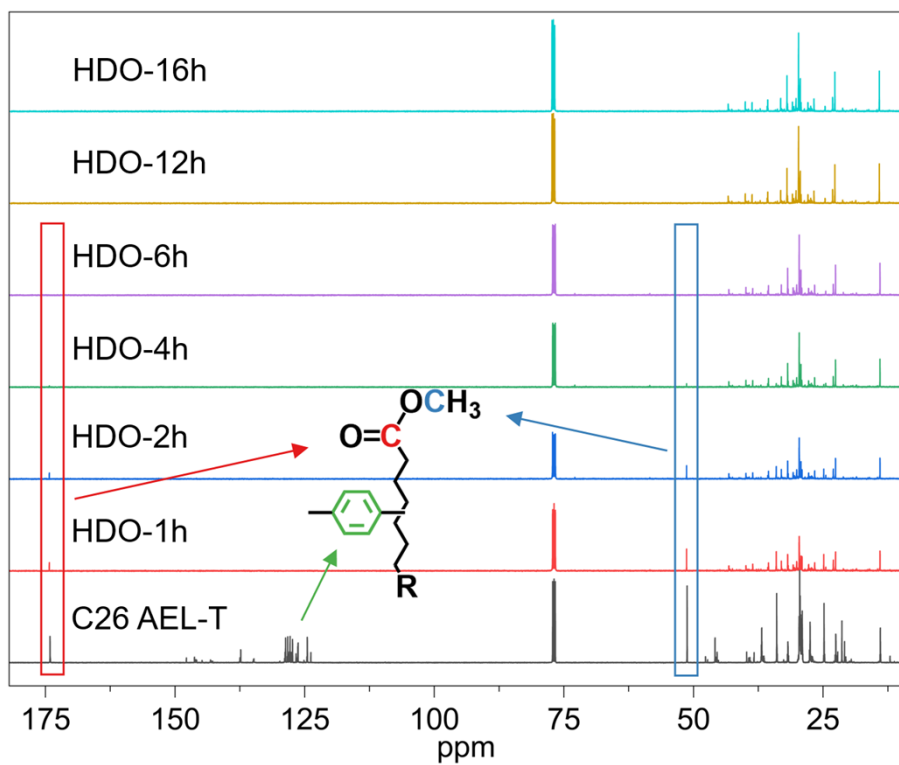

**Fig. S2** The measurement of  $^{13}\text{C}$ -NMR of the products from time dependent experiments.

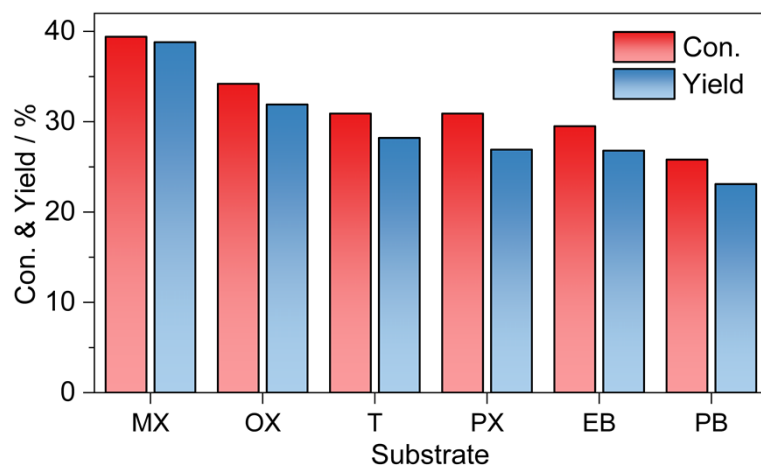

**Fig. S3** Alkylation of methyl oleate with diverse aromatics at low conversion. Reaction conditions:  $\text{AlCl}_3$  (1.5 mmol), methyl oleate (3 mmol), aromatic (48 mmol), T (60 °C), t (1 h).

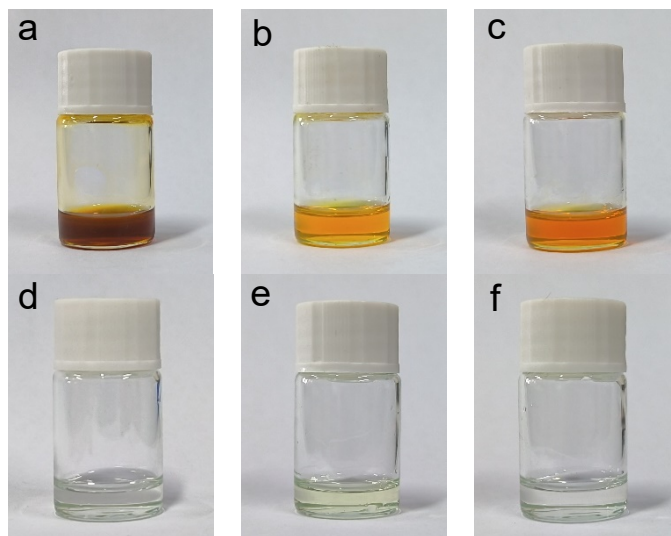

**Fig. S4** The appearance of  $C_{26}$  AEL-T (a),  $C_{27}$  AEL-PX (b),  $C_{28}$  AEL-PB (c),  $C_{25}$  CBAL-T (d),  $C_{26}$  CBAL-PX (e),  $C_{27}$  CBAL-PB (f).



(a)

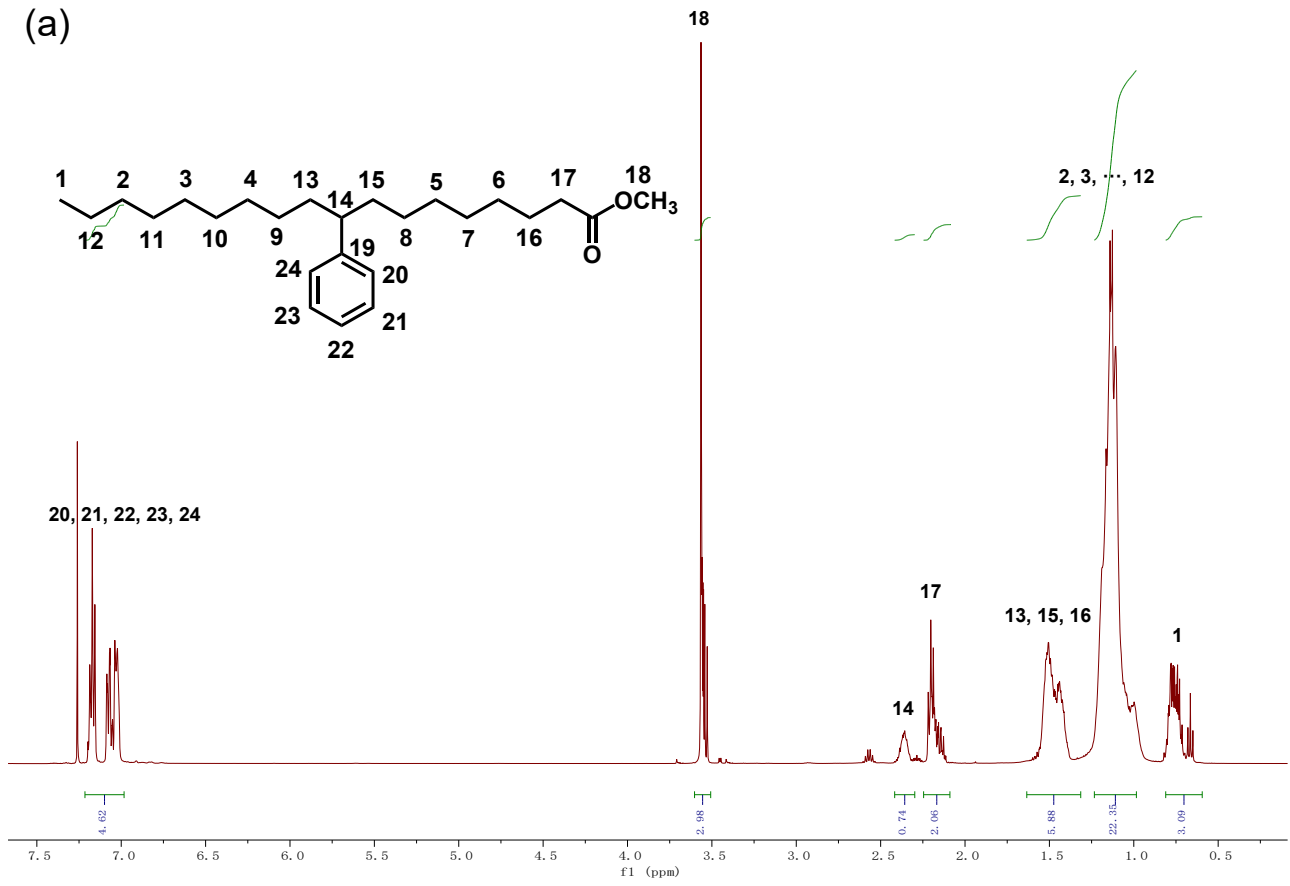

(b)

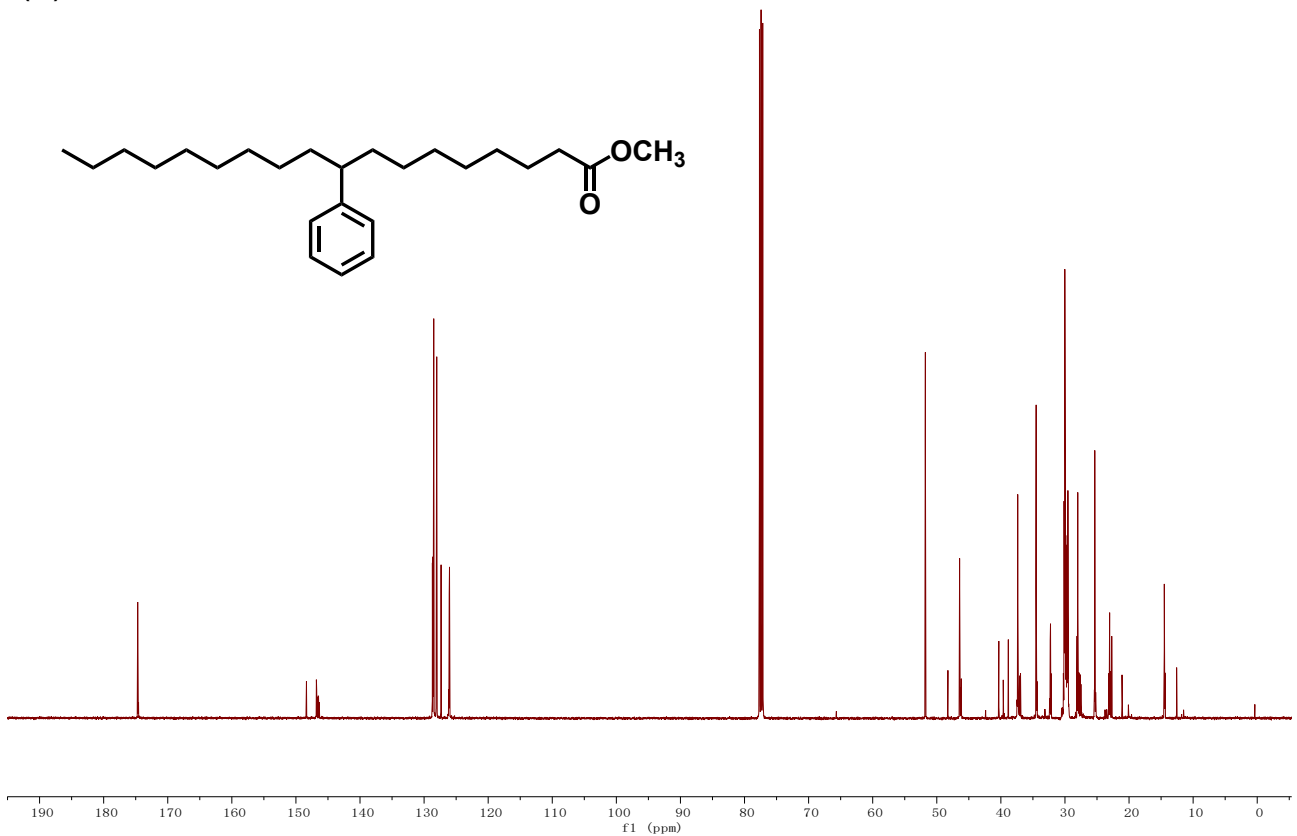

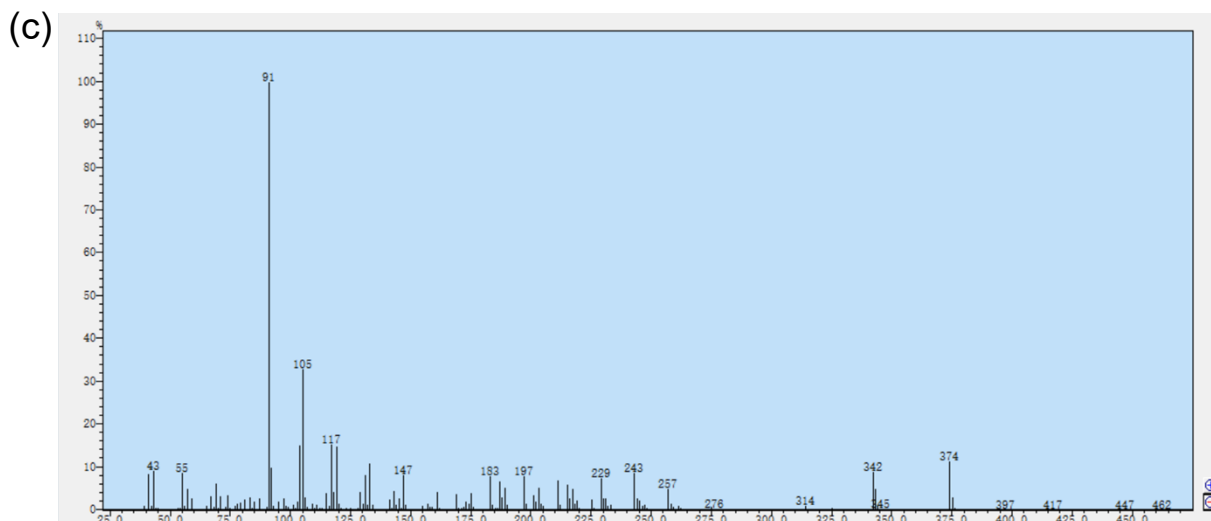

**Fig. S5** (a)  $^1\text{H}$ -NMR, (b)  $^{13}\text{C}$ -NMR, and (c) Mass spectra of  $\text{C}_{25}$  AEL-B.

(a)

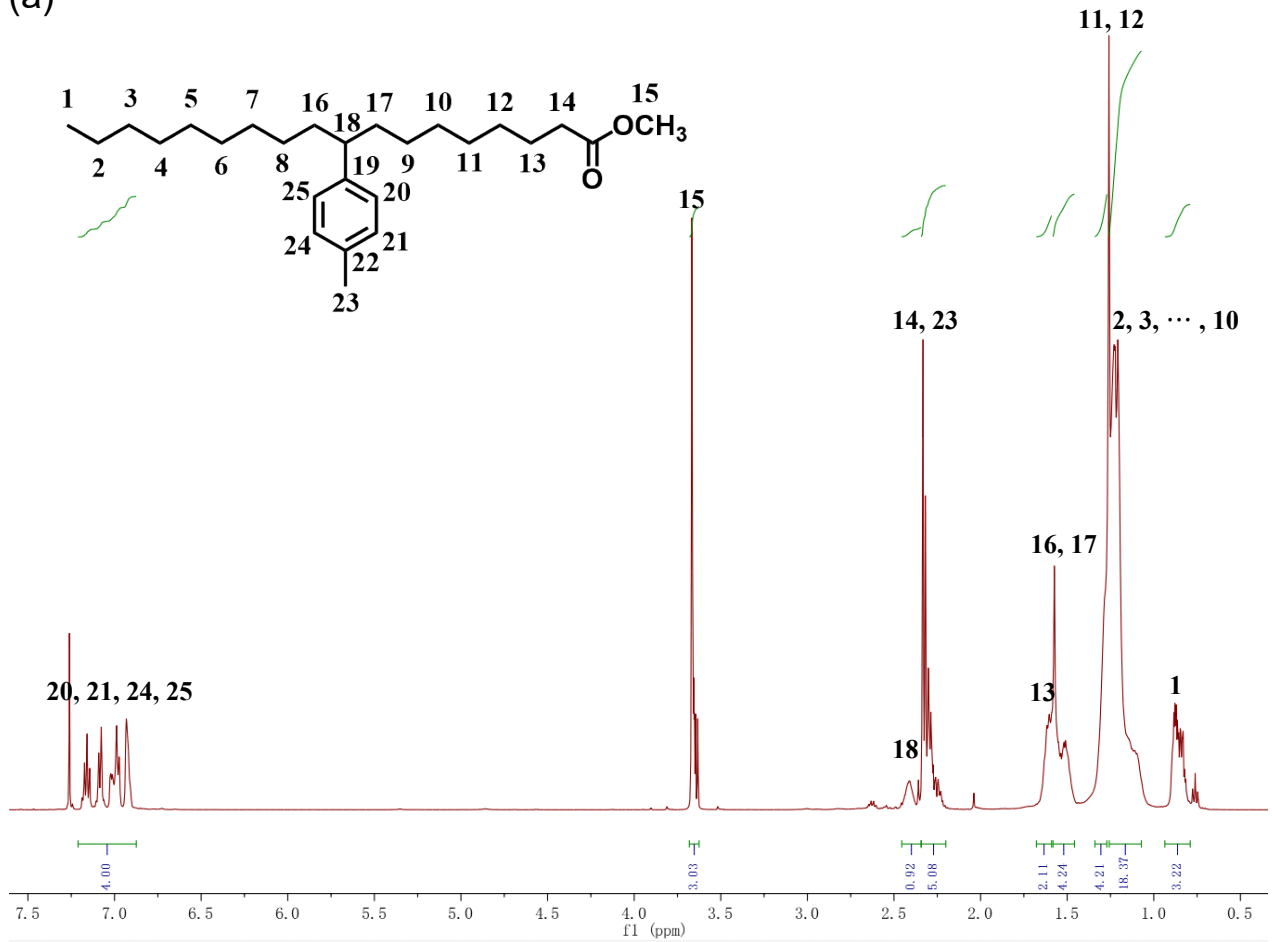

(b)

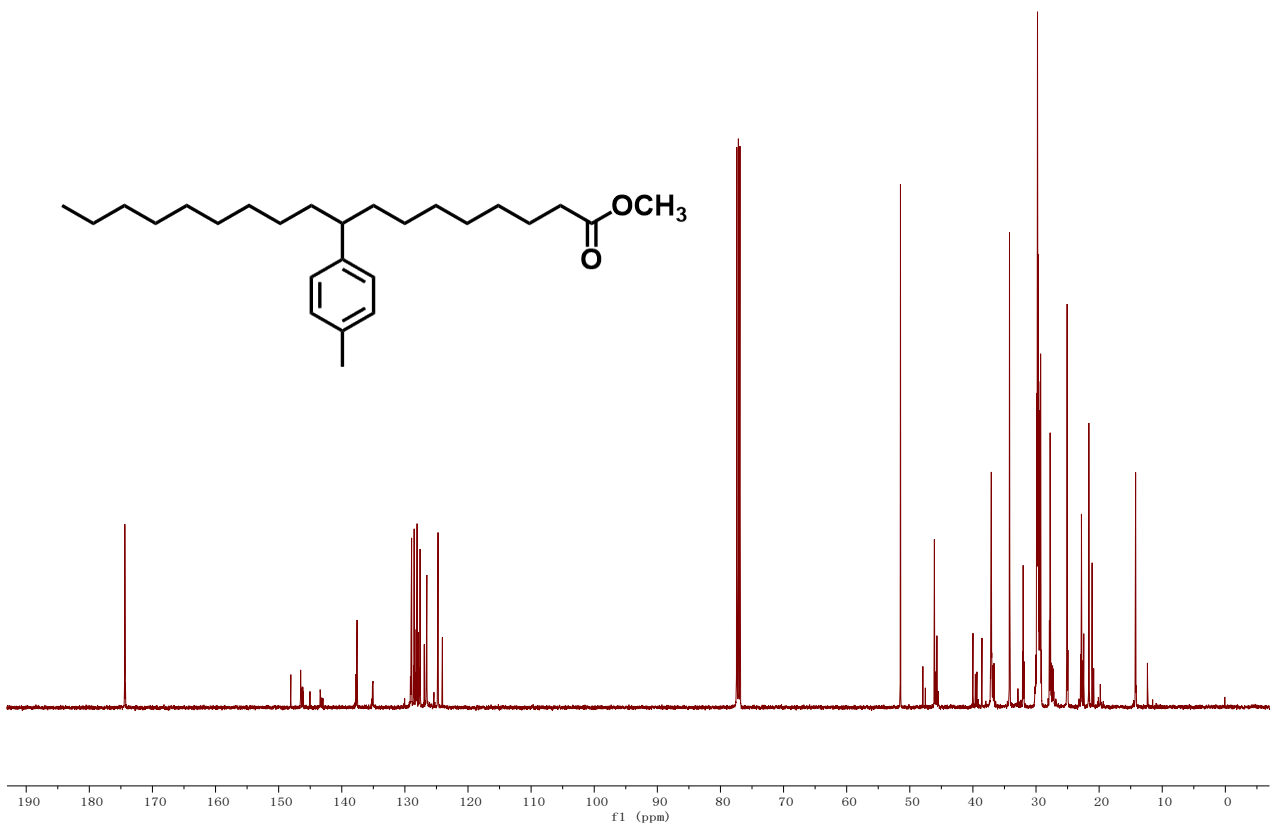

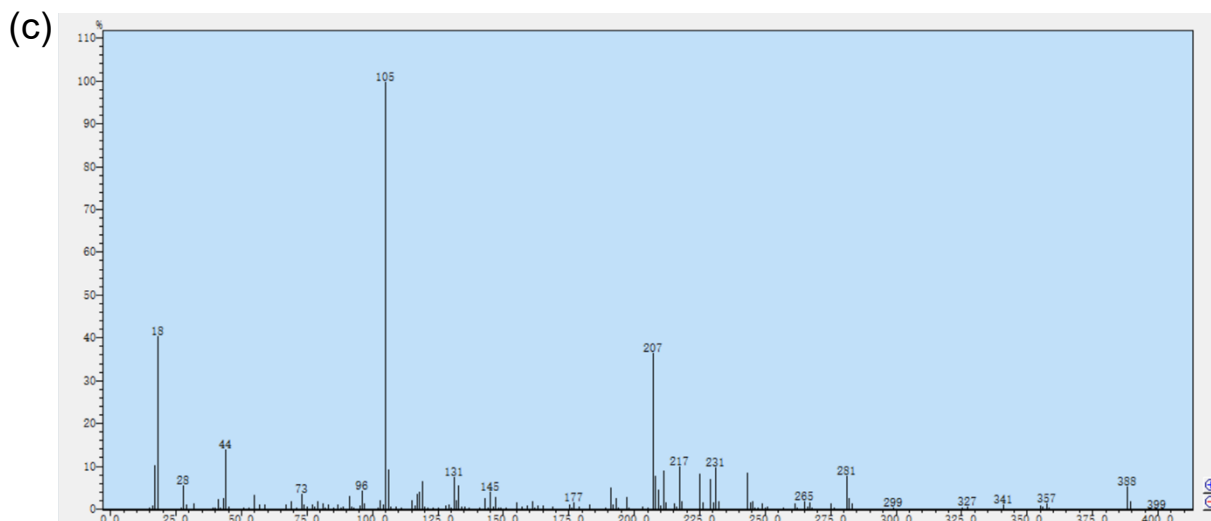

**Fig. S6** (a)  $^1\text{H}$ -NMR, (b)  $^{13}\text{C}$ -NMR, and (c) Mass spectra of  $\text{C}_{26}$  AEL-T.

(a)

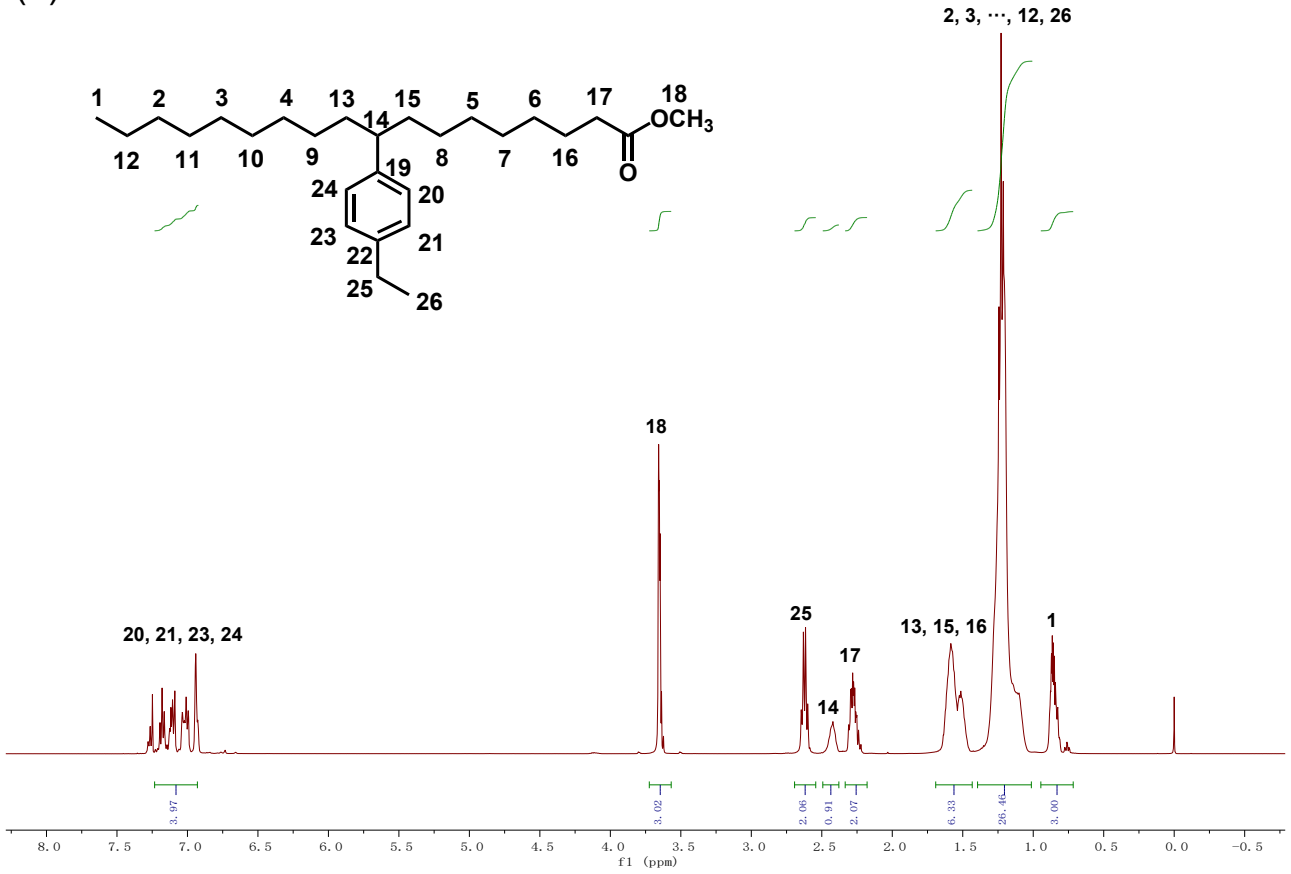

(b)

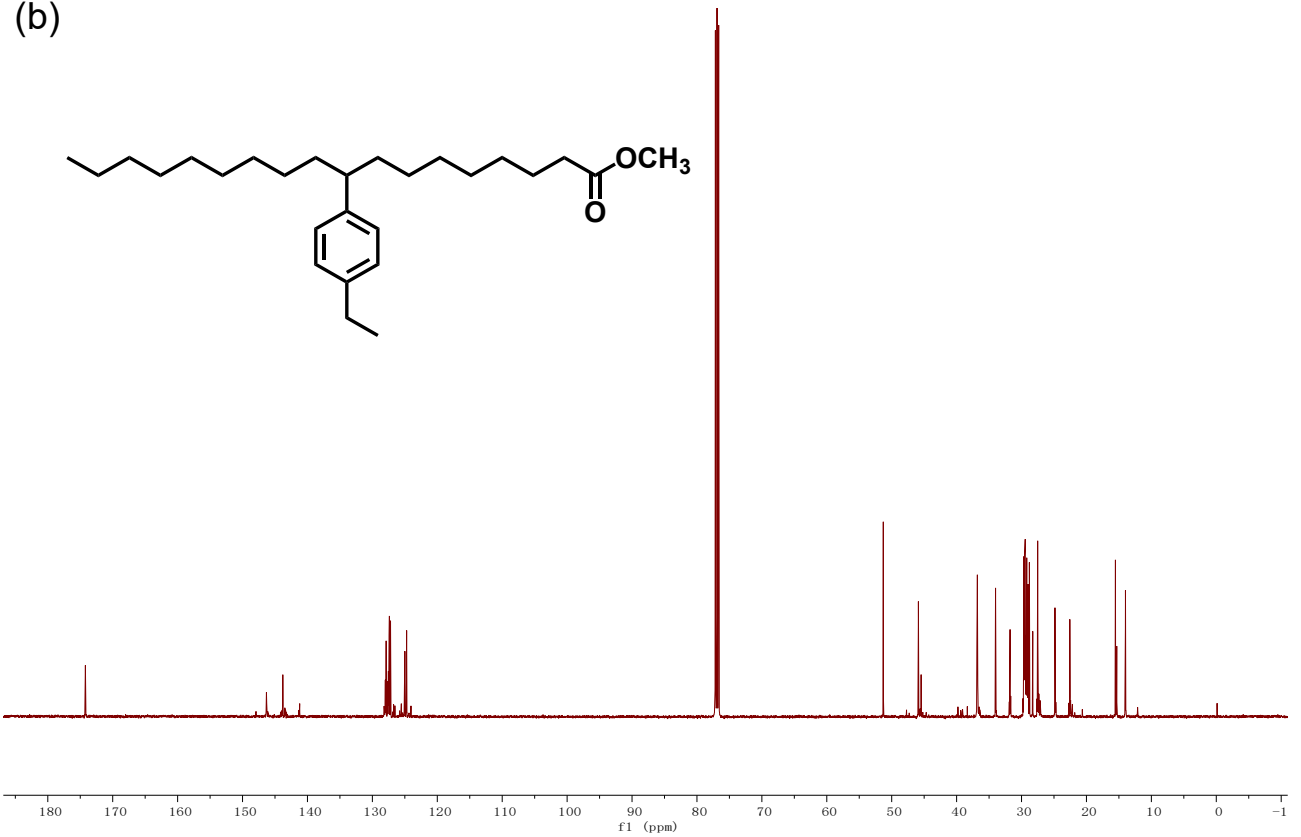

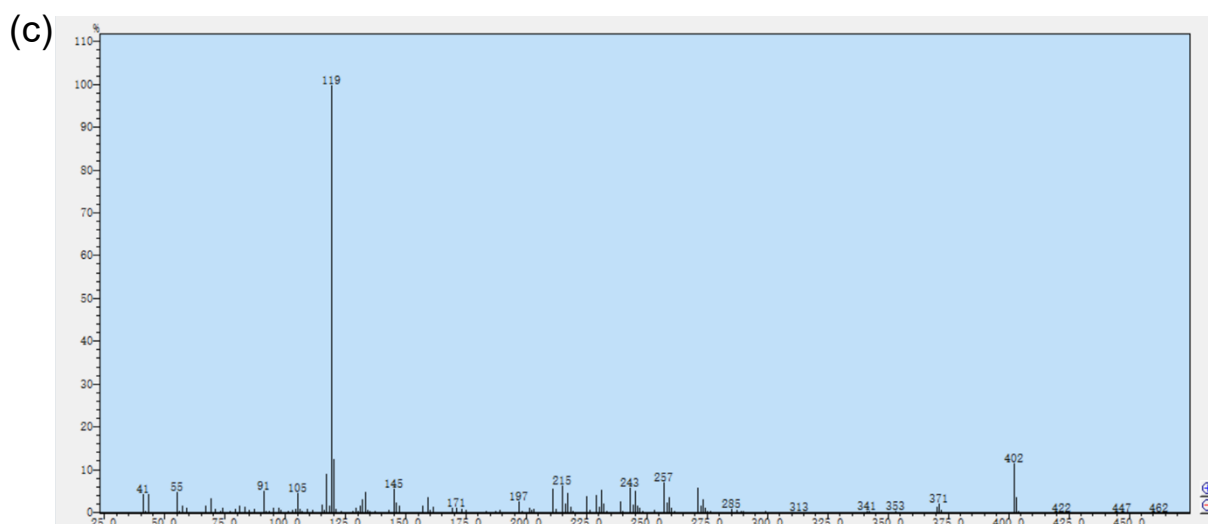

**Fig. S7** (a)  $^1\text{H}$ -NMR, (b)  $^{13}\text{C}$ -NMR, and (c) Mass spectra of  $\text{C}_{27}$  AEL-EB.

(a)

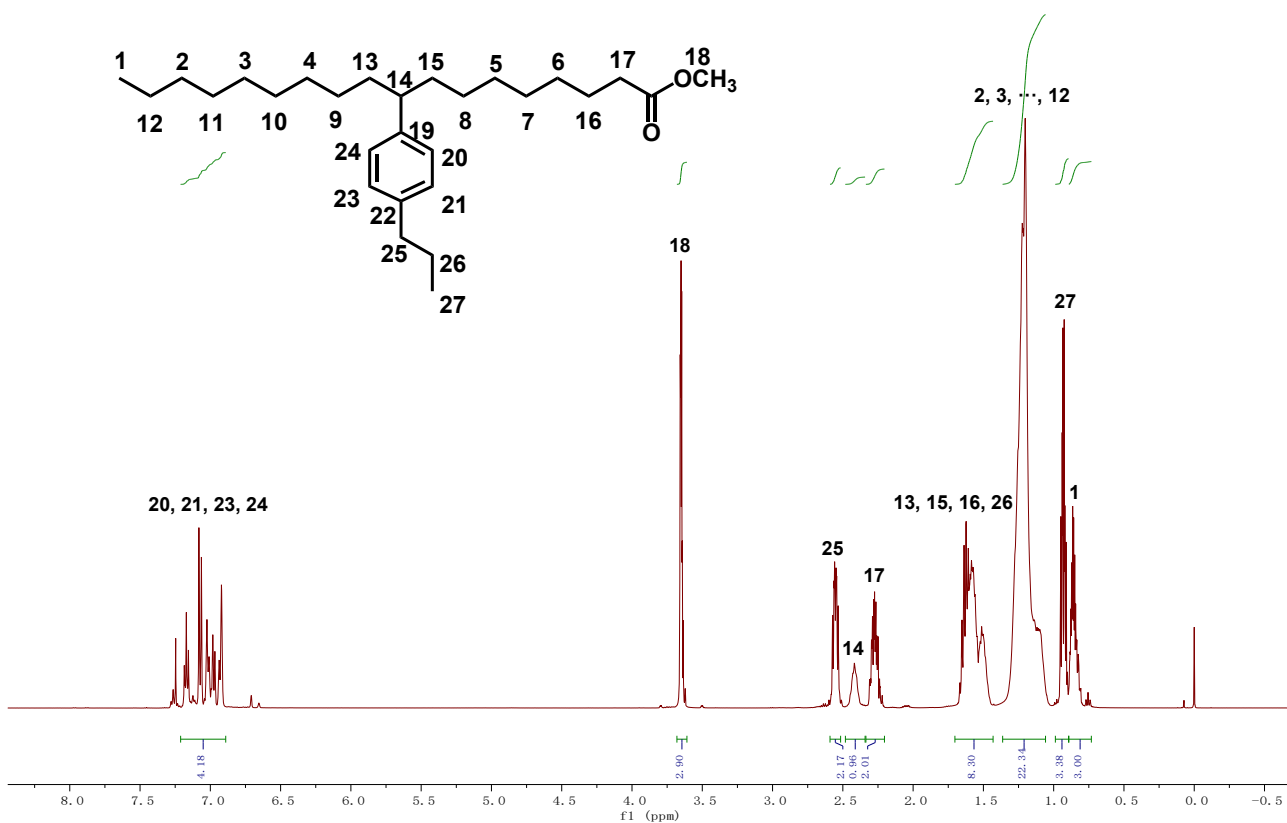

(b)

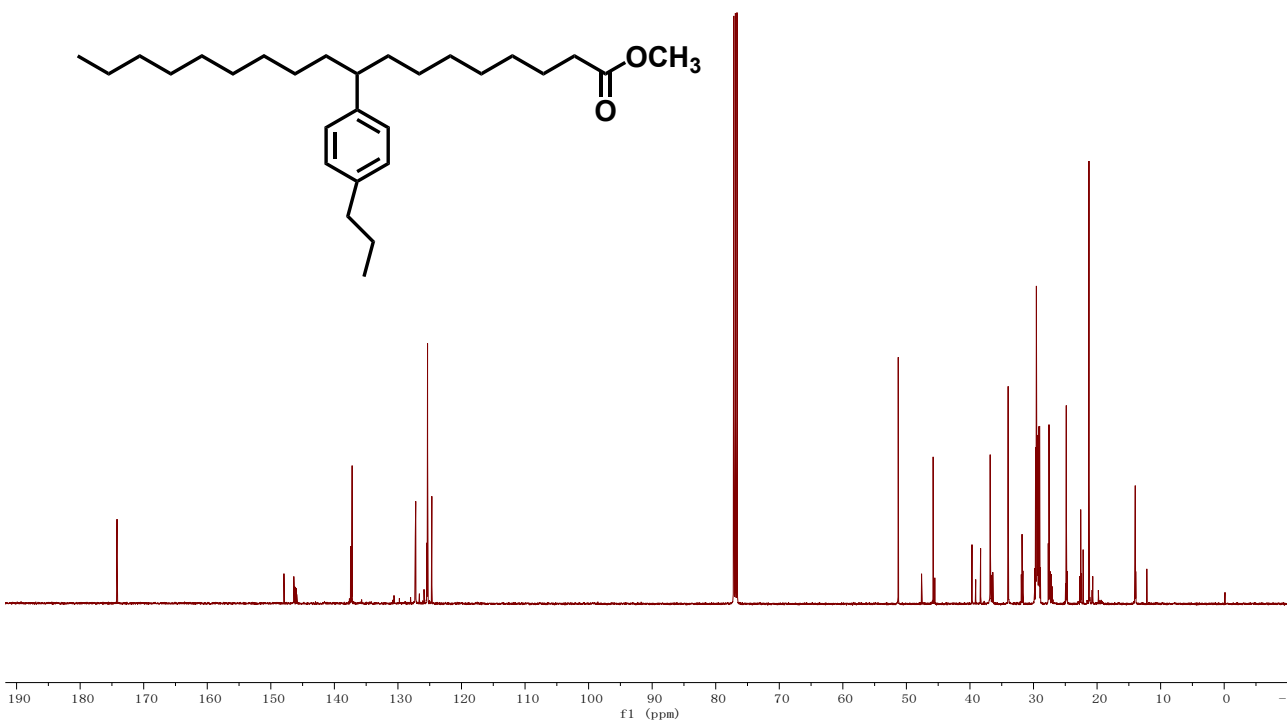

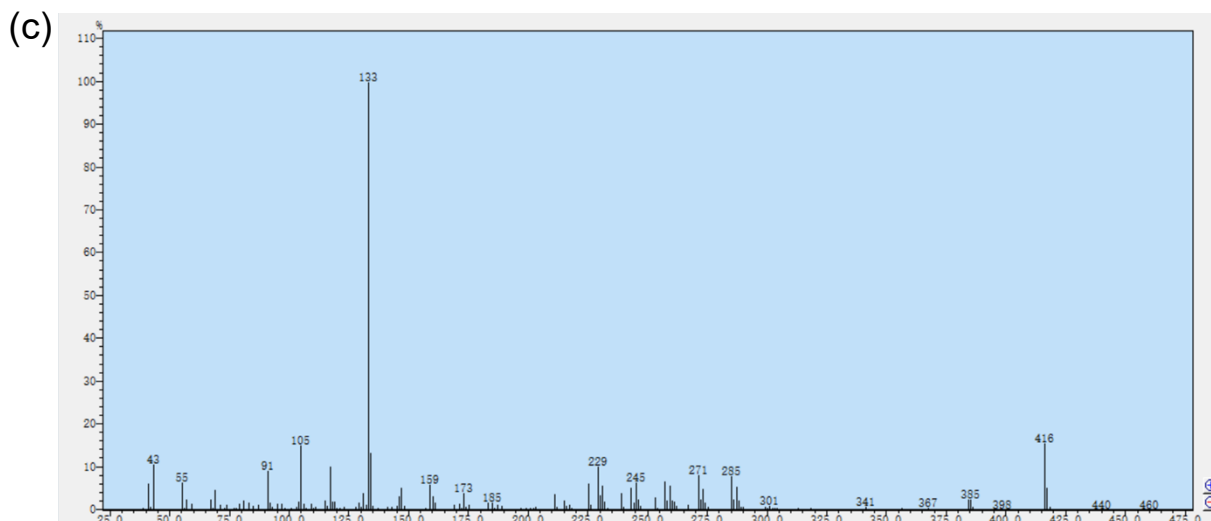

**Fig. S8** (a)  $^1\text{H}$ -NMR, (b)  $^{13}\text{C}$ -NMR, and (c) Mass spectra of  $\text{C}_{28}$  AEL-PB.



(a)

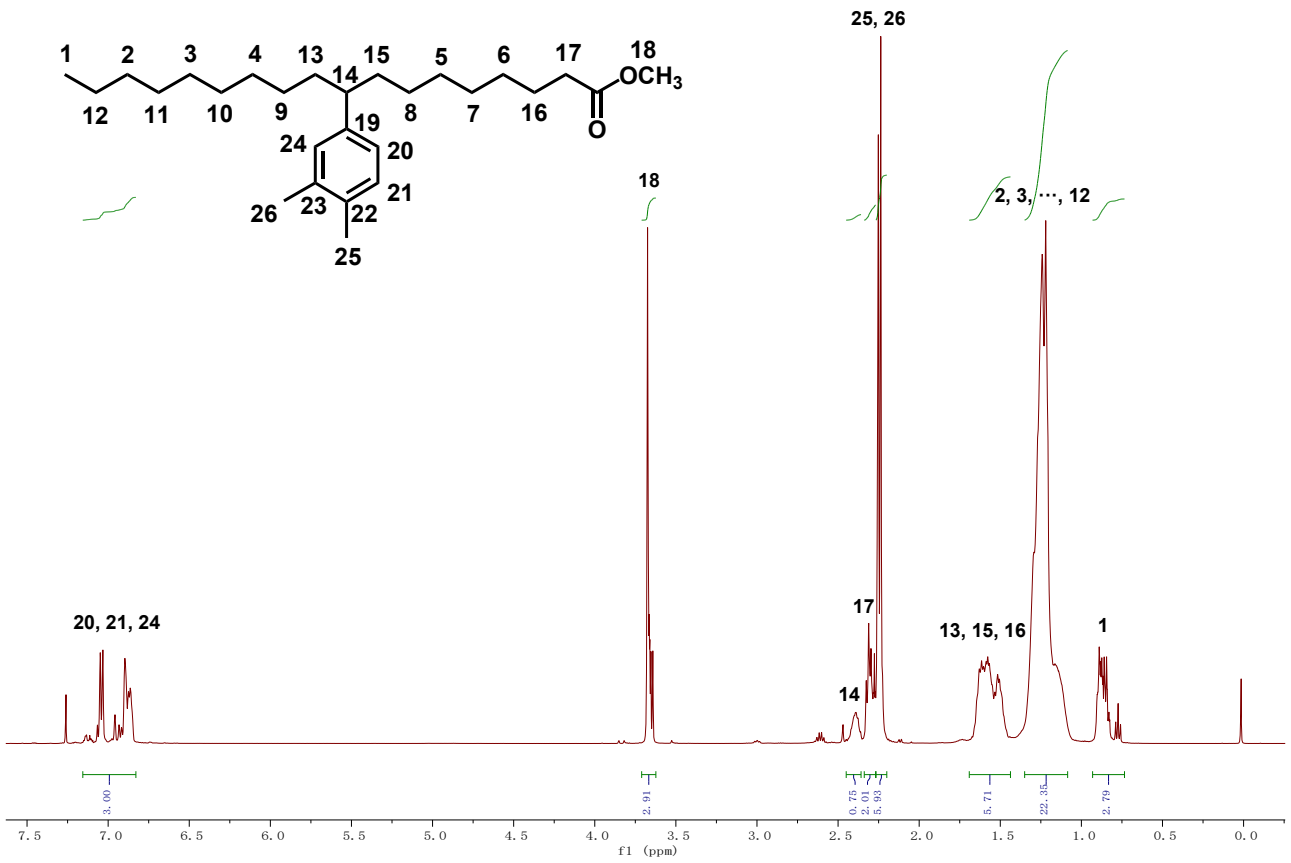

(b)

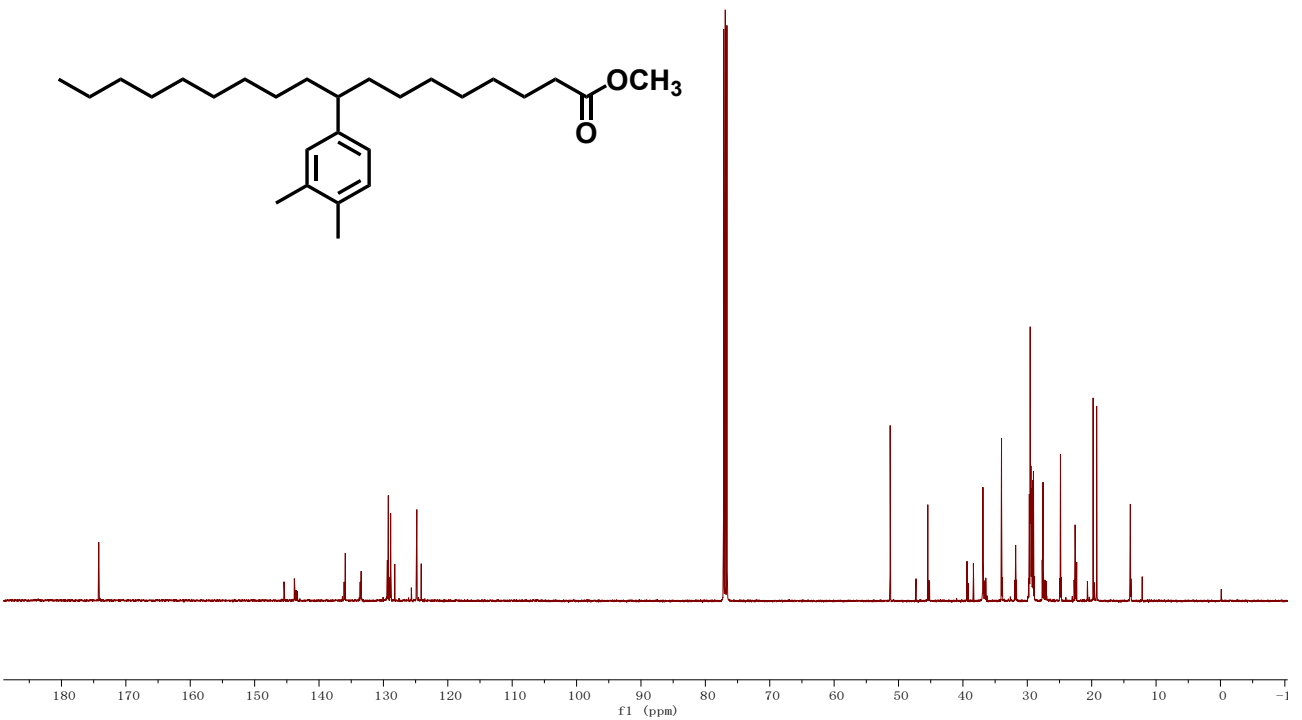

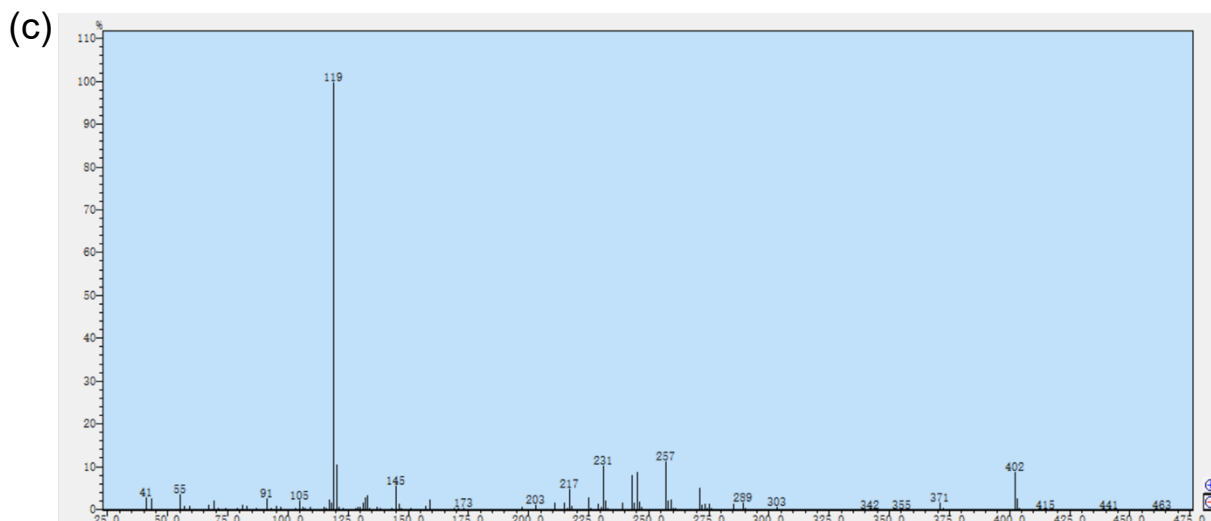

**Fig. S9** (a)  $^1\text{H}$ -NMR, (b)  $^{13}\text{C}$ -NMR, and (c) Mass spectra of  $\text{C}_{27}$  AEL-OX.

(a)

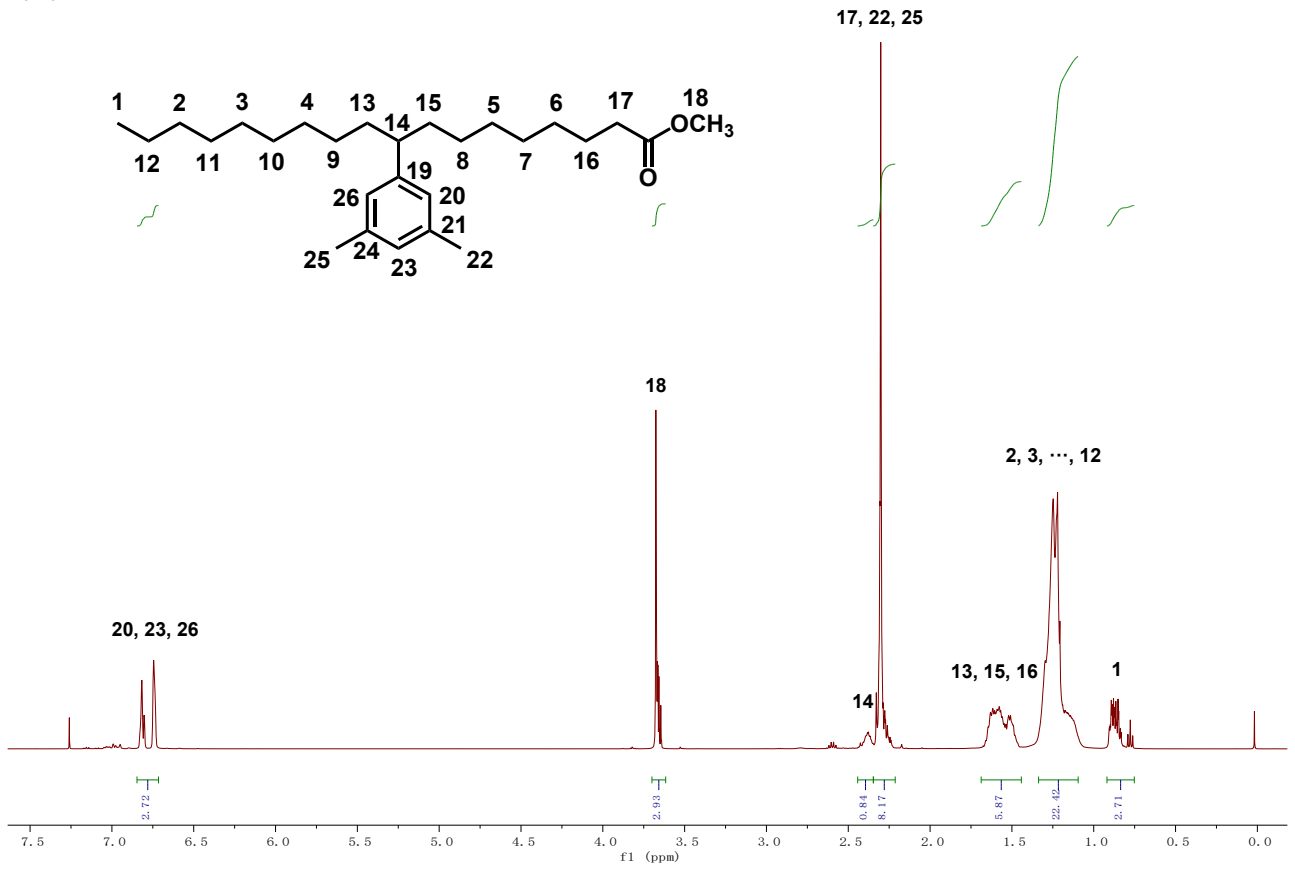

(b)

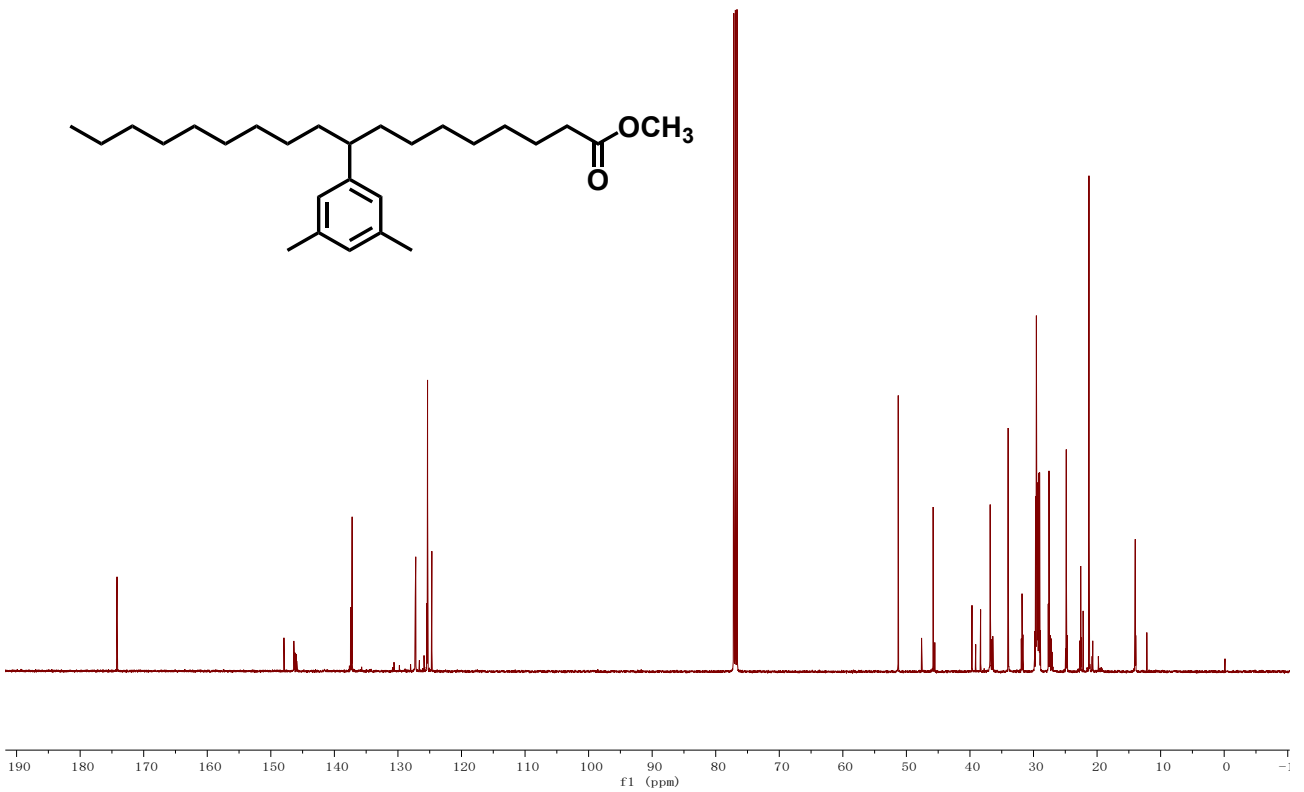

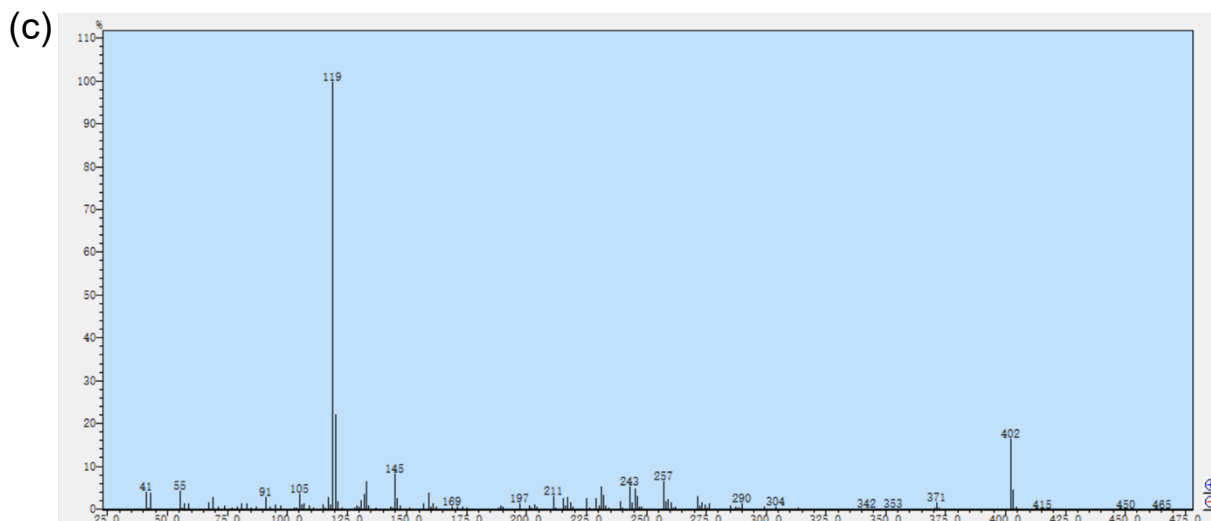

**Fig. S10** (a)  $^1\text{H-NMR}$ , (b)  $^{13}\text{C-NMR}$ , and (c) Mass spectra of  $\text{C}_{27}$  AEL-MX.

(a)

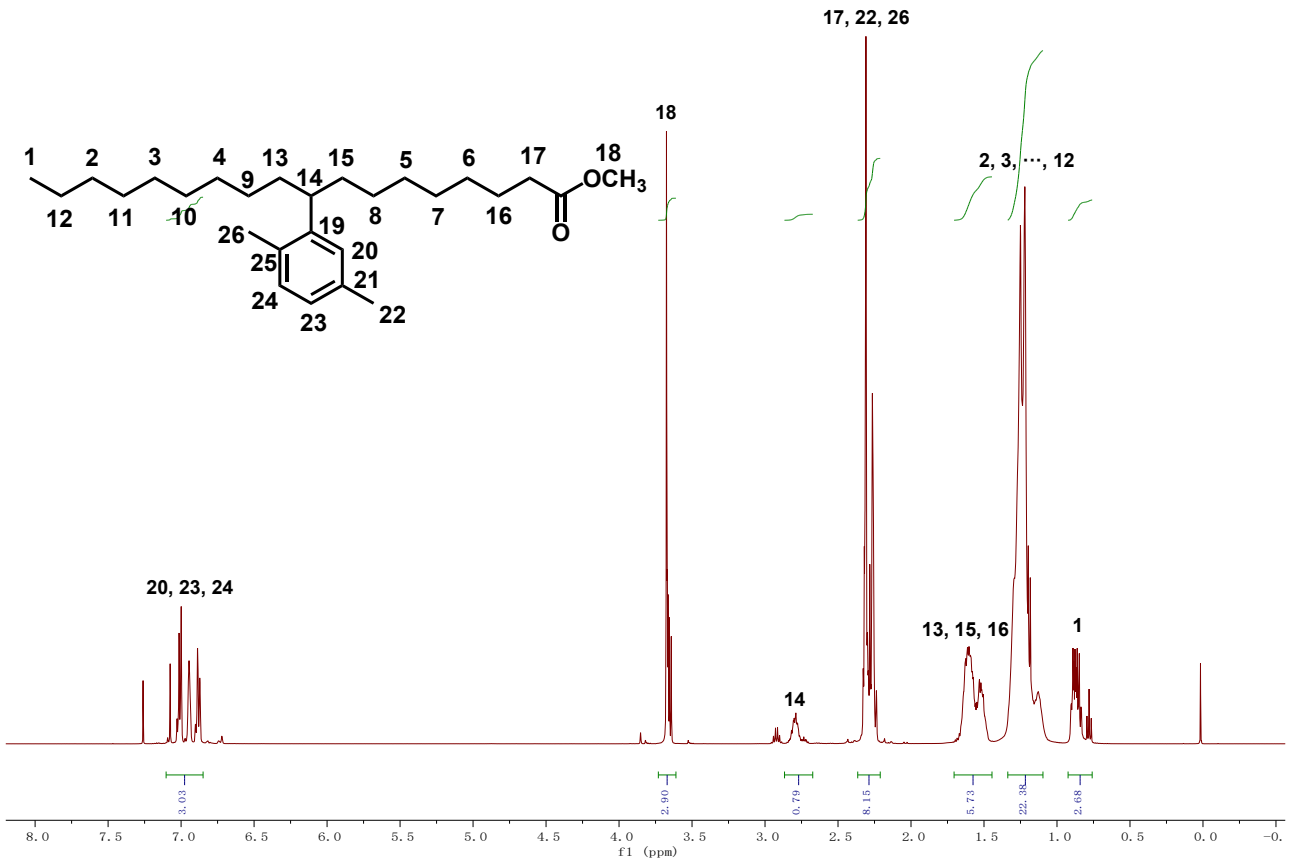

(b)

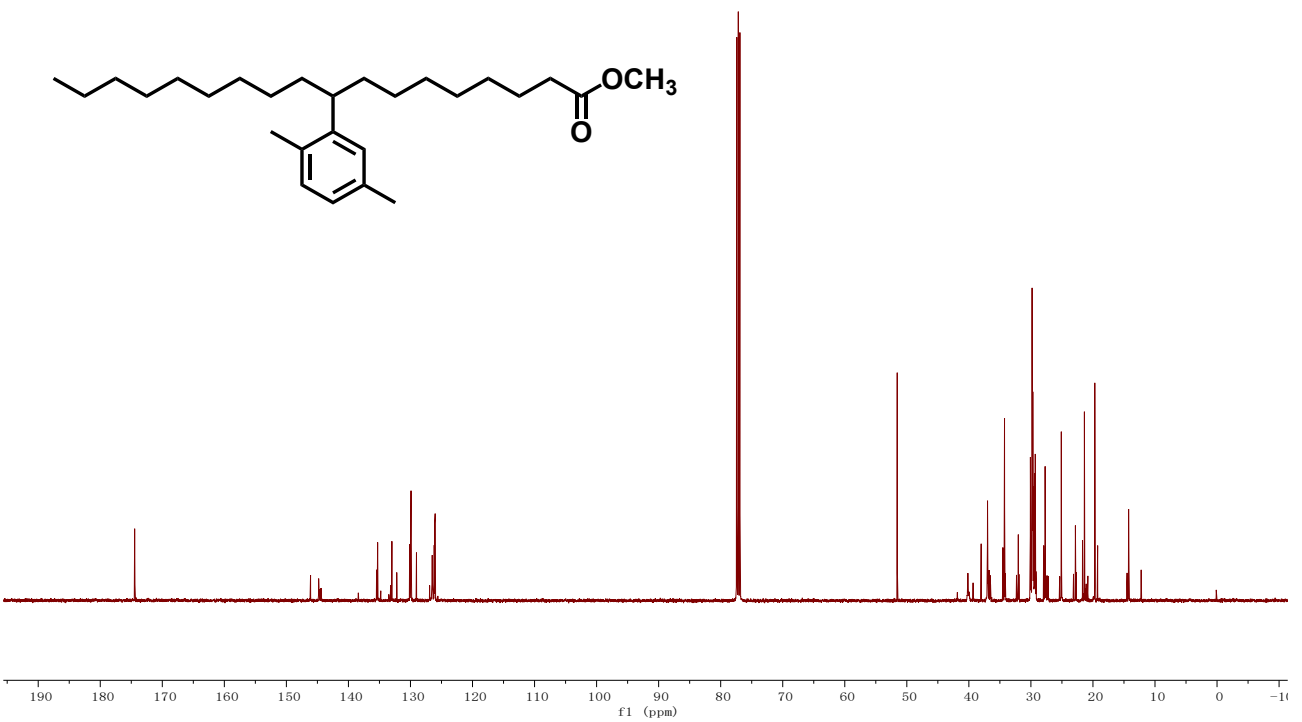

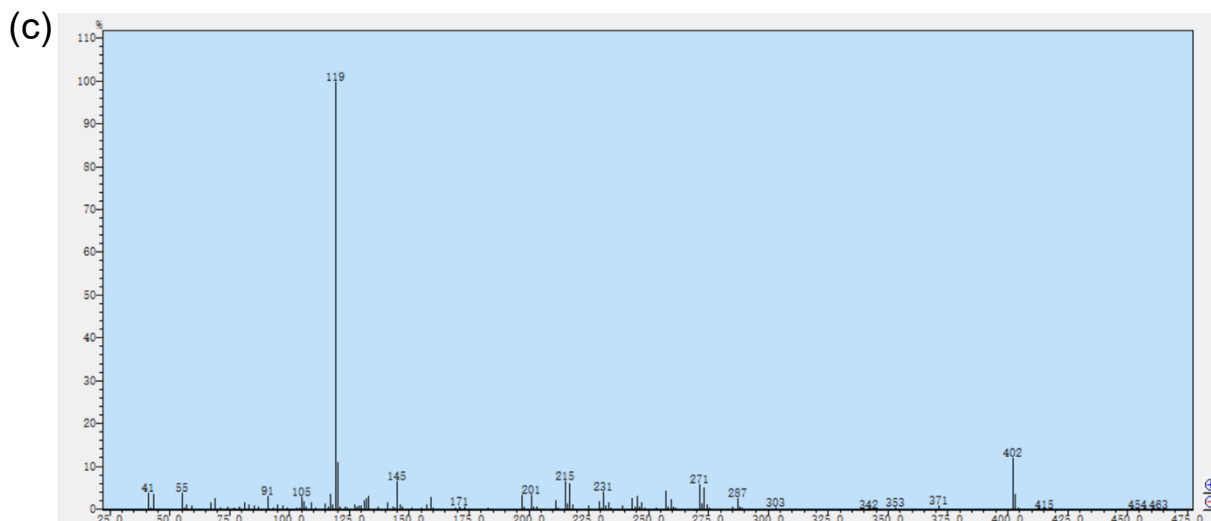

**Fig. S11** (a)  $^1\text{H}$ -NMR, (b)  $^{13}\text{C}$ -NMR, and (c) Mass spectra of  $\text{C}_{27}$  AEL-PX.

(a)

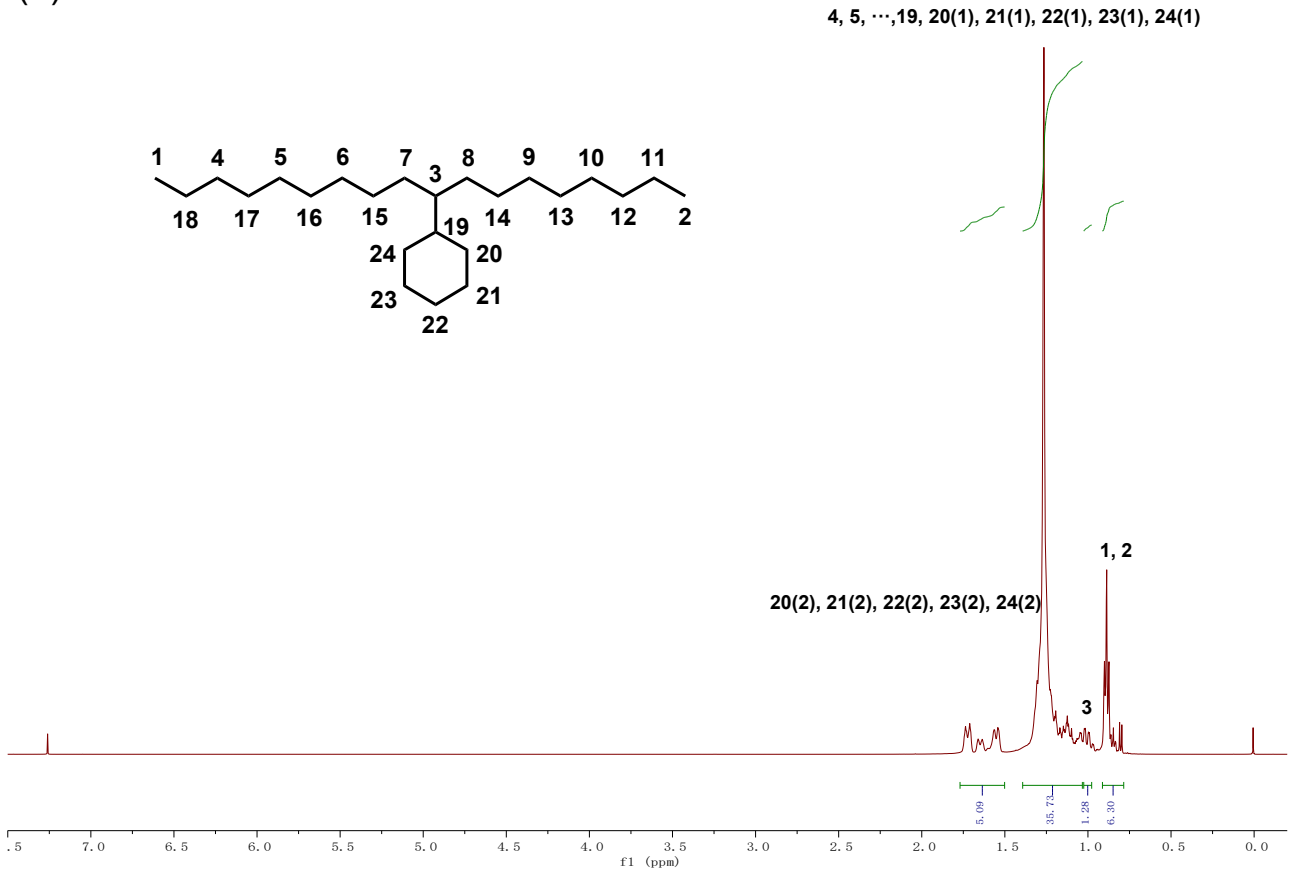

(b)

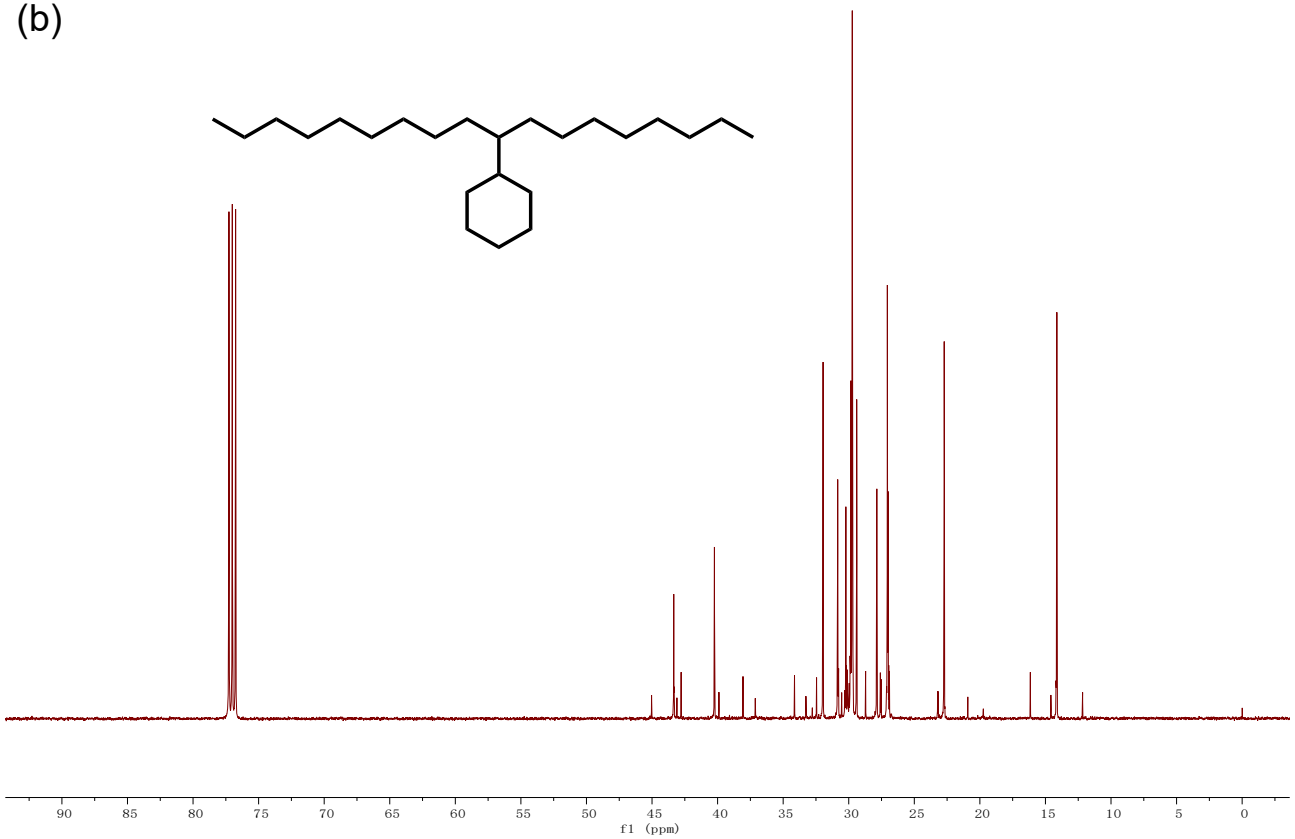

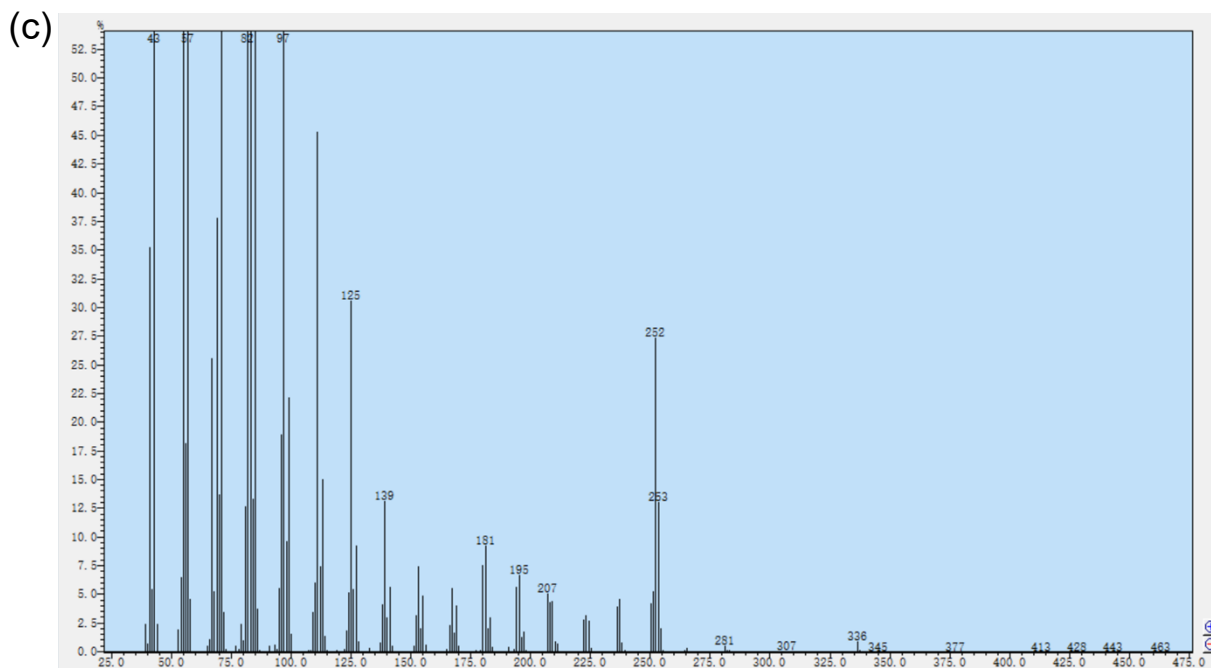

**Fig. S12** (a)  $^1\text{H}$ -NMR, (b)  $^{13}\text{C}$ -NMR, and (c) Mass spectra of  $\text{C}_{24}$  CBAL-B.



(a)

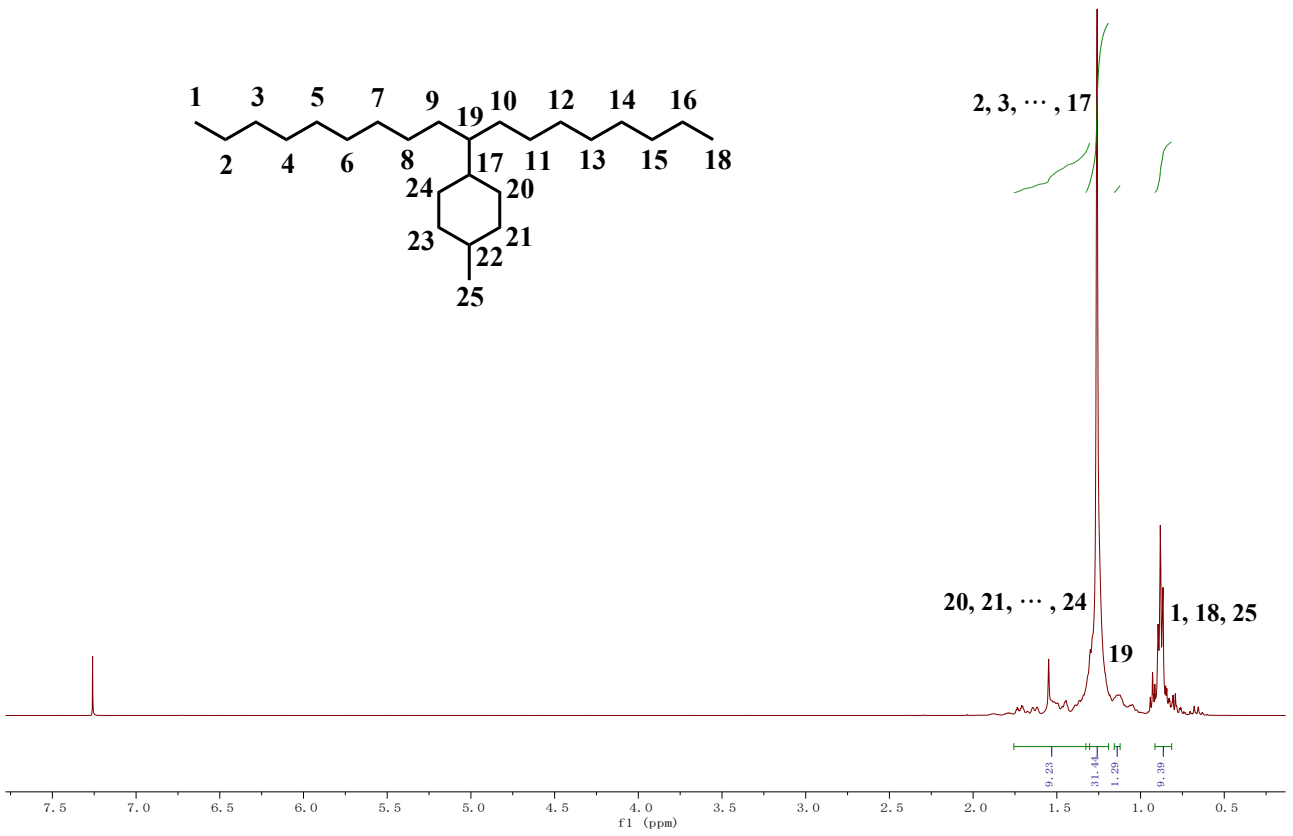

(b)

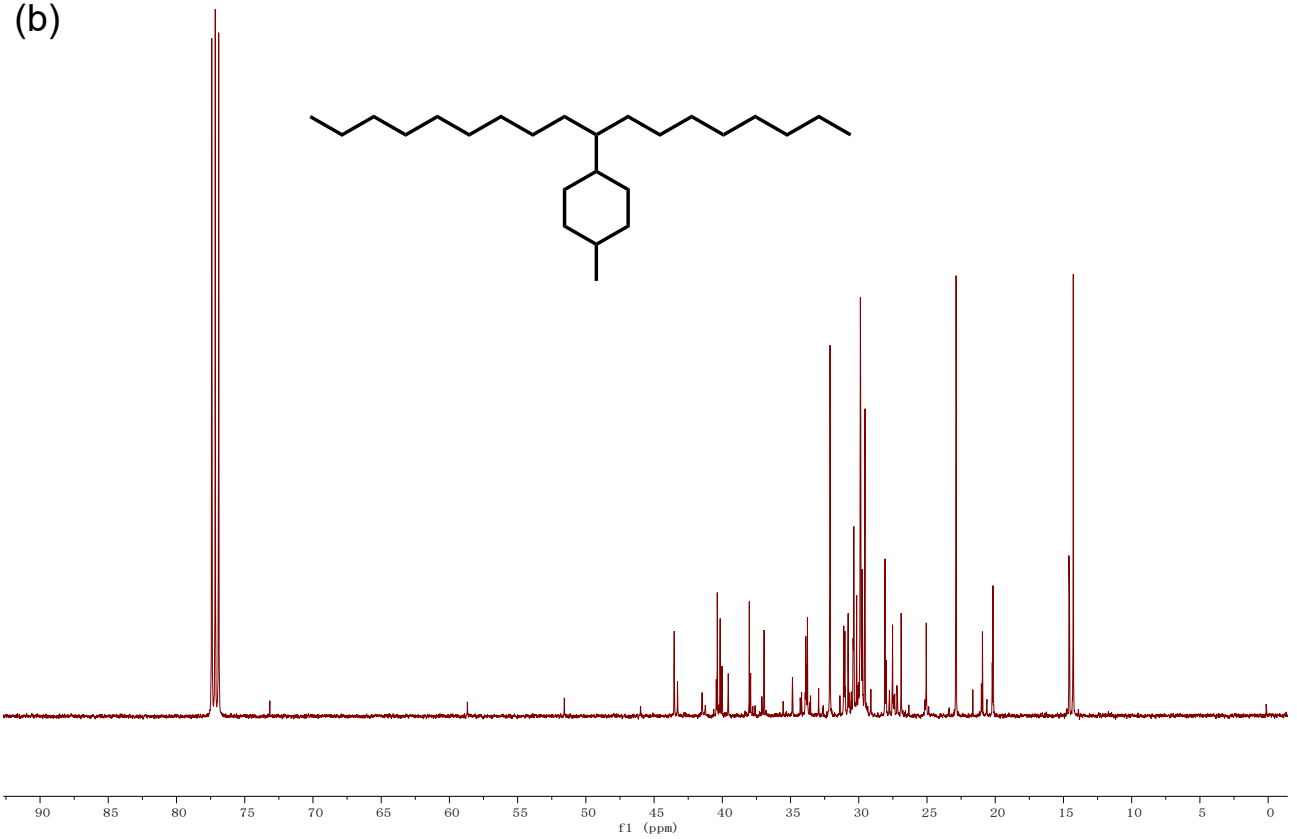

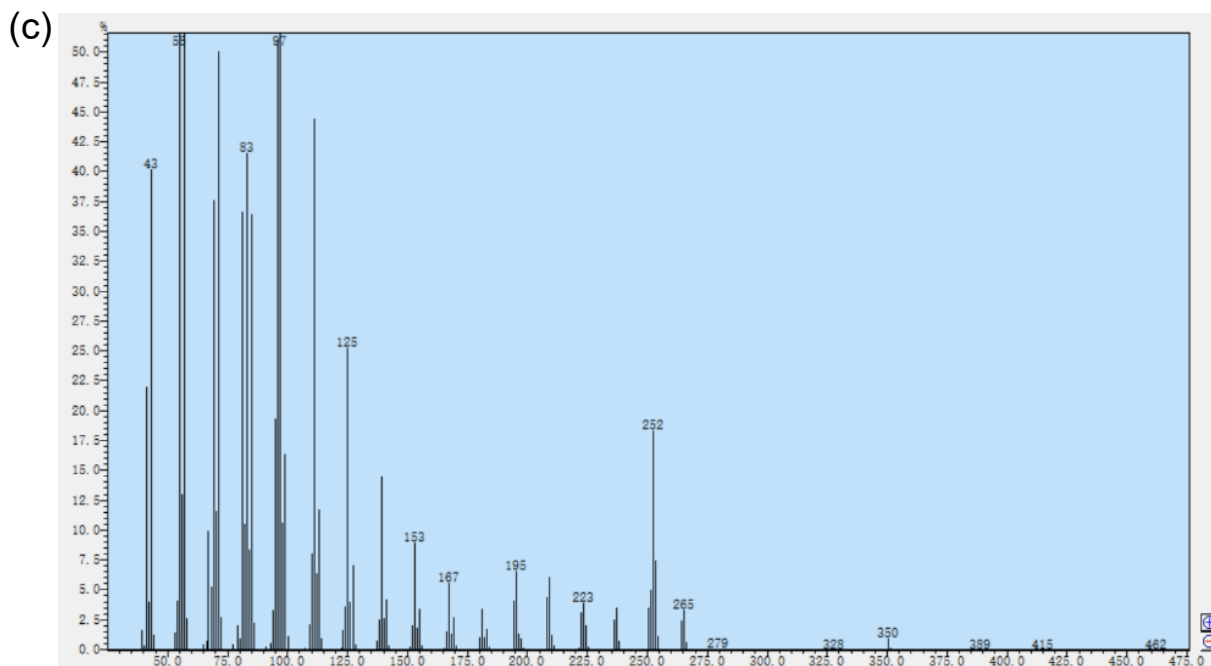

**Fig. S13** (a)  $^1\text{H}$ -NMR, (b)  $^{13}\text{C}$ -NMR, and (c) Mass spectra of  $\text{C}_{25}$  CBAL-T.

(a)

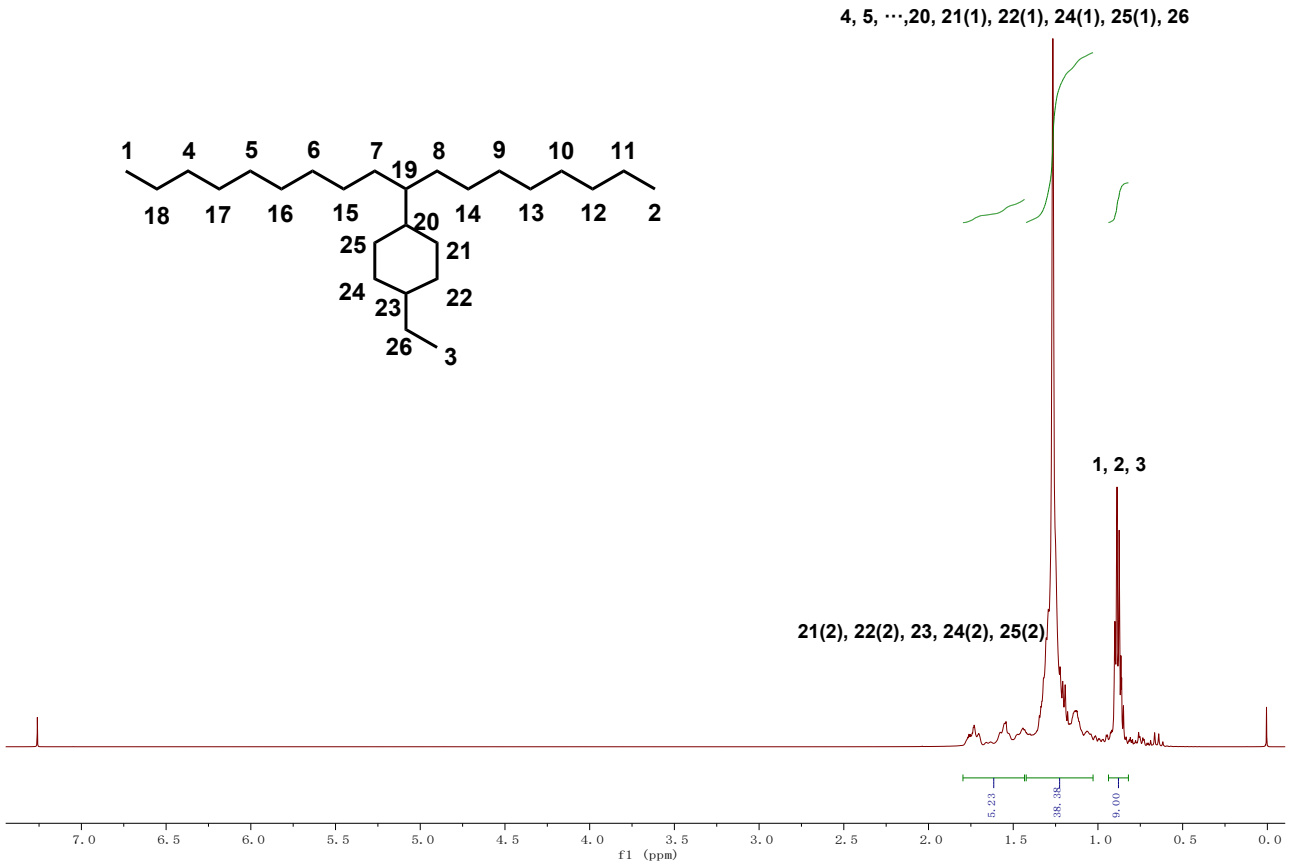

(b)

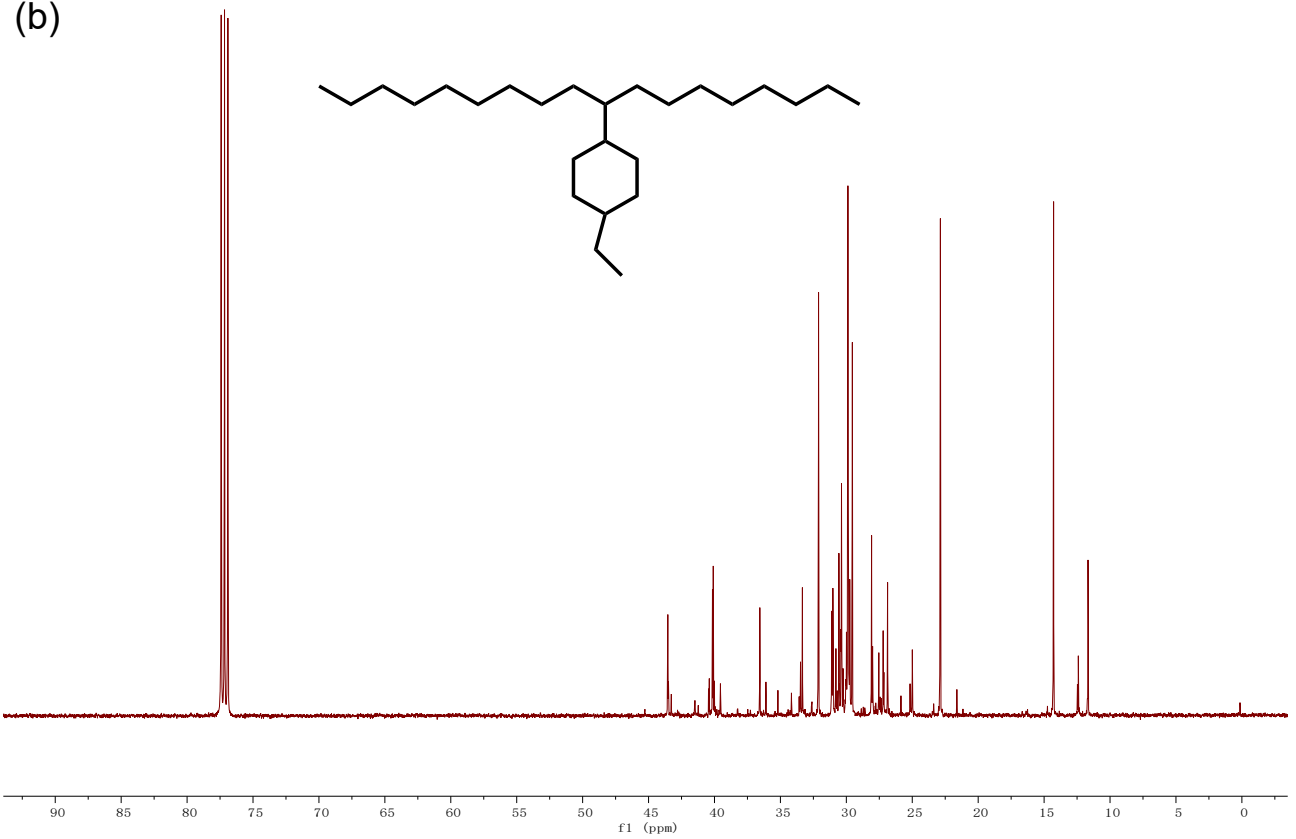

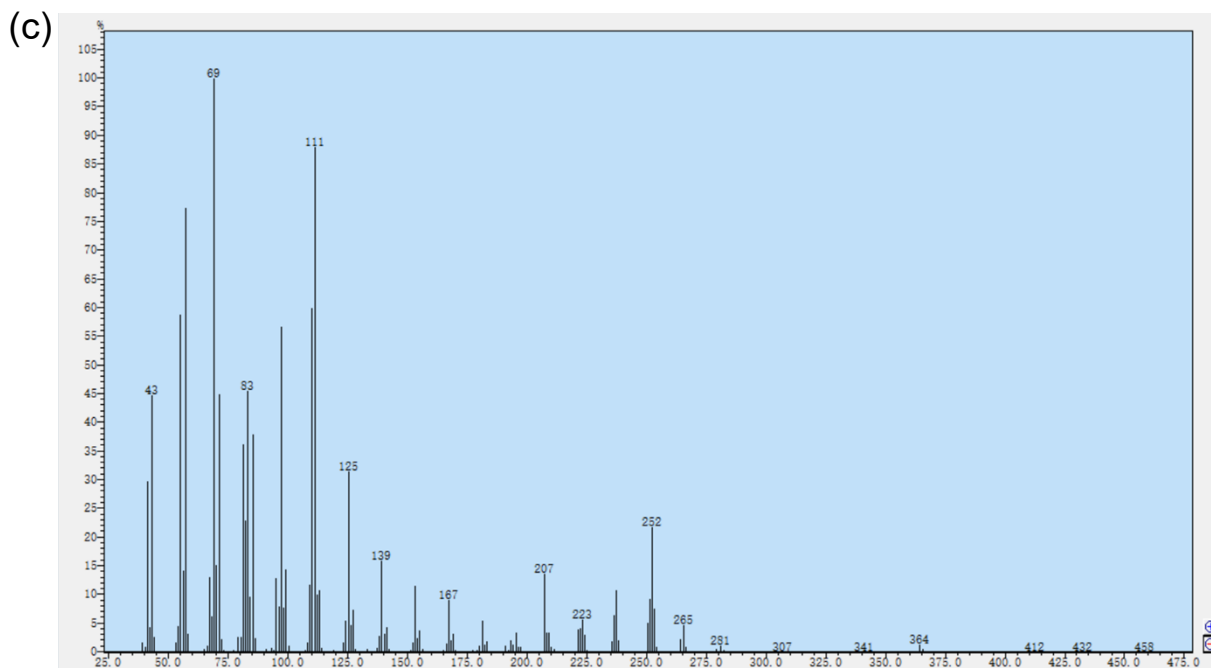

**Fig. S14** (a)  $^1\text{H}$ -NMR, (b)  $^{13}\text{C}$ -NMR, and (c) Mass spectra of  $\text{C}_{26}$  CBAL-EB.

(a)

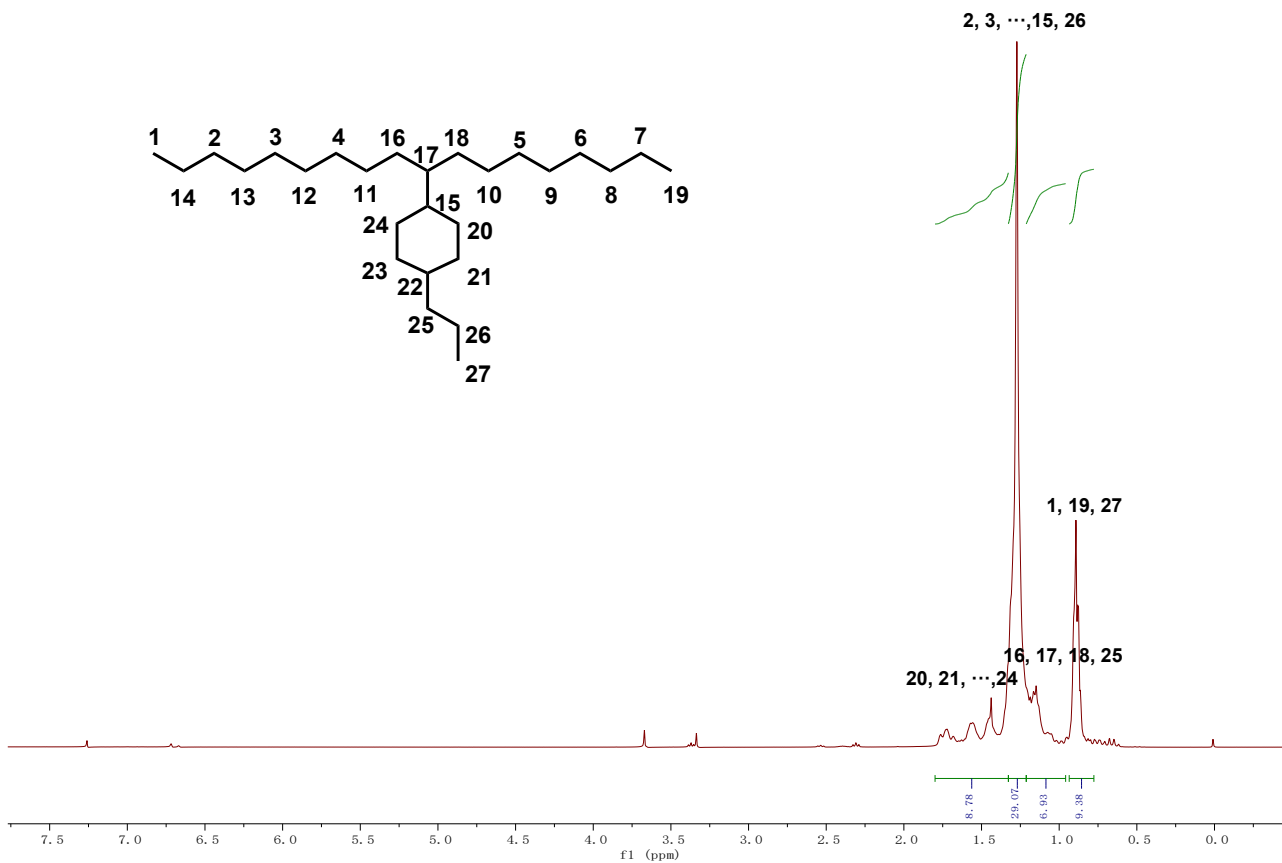

(b)

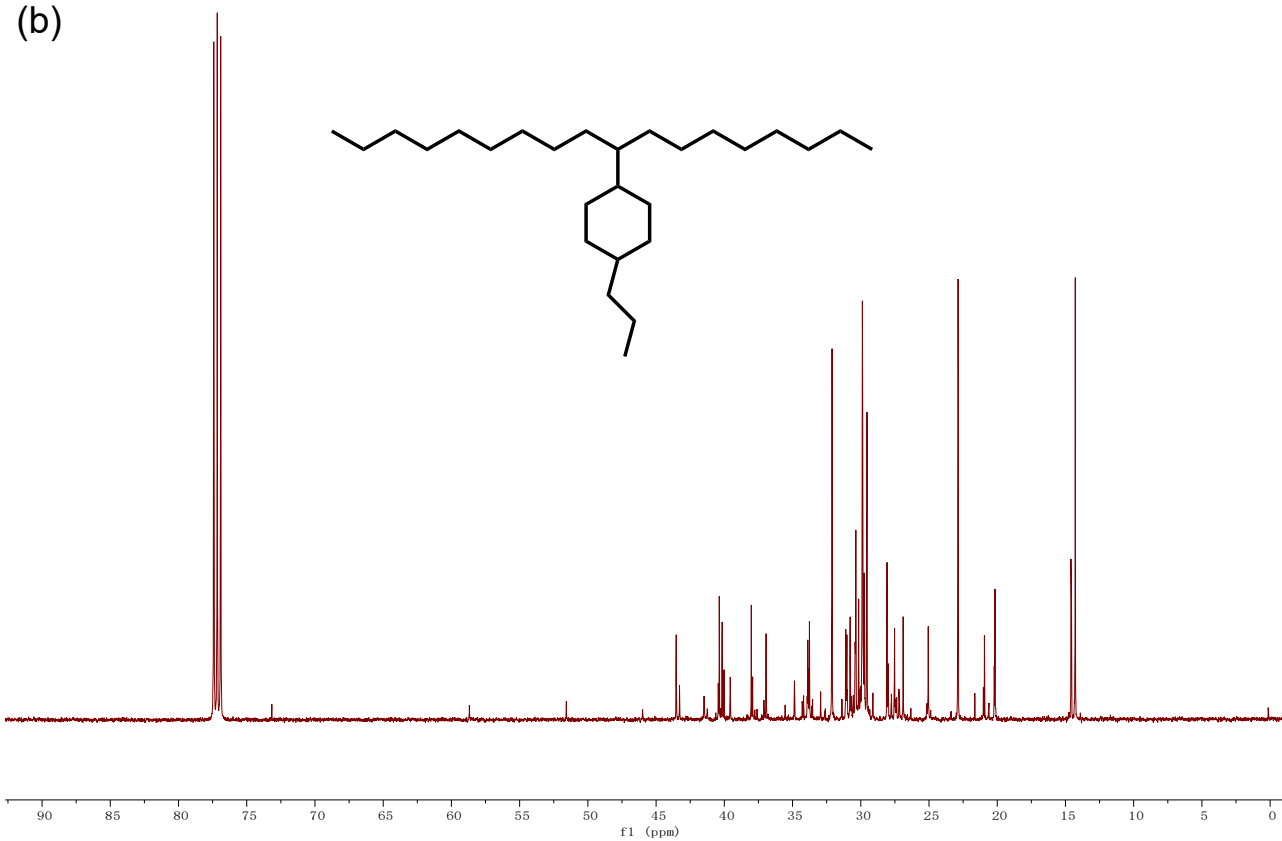

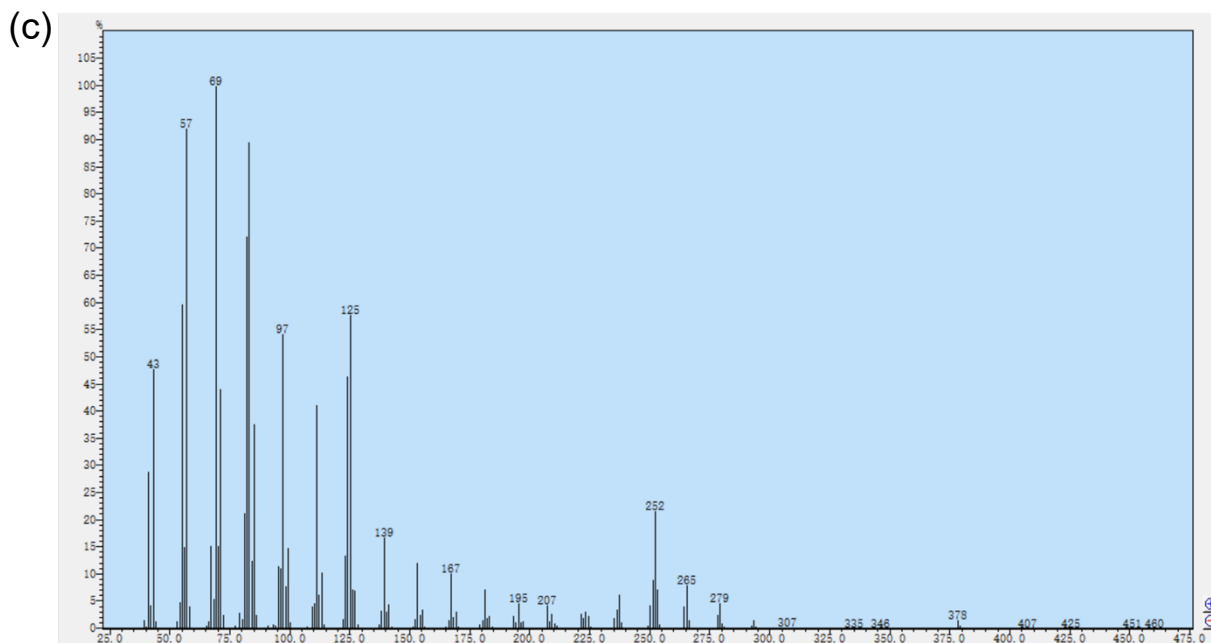

**Fig. S15** (a)  $^1\text{H}$ -NMR, (b)  $^{13}\text{C}$ -NMR, and (c) Mass spectra of  $\text{C}_{27}$  CBAL-PB.

(a)

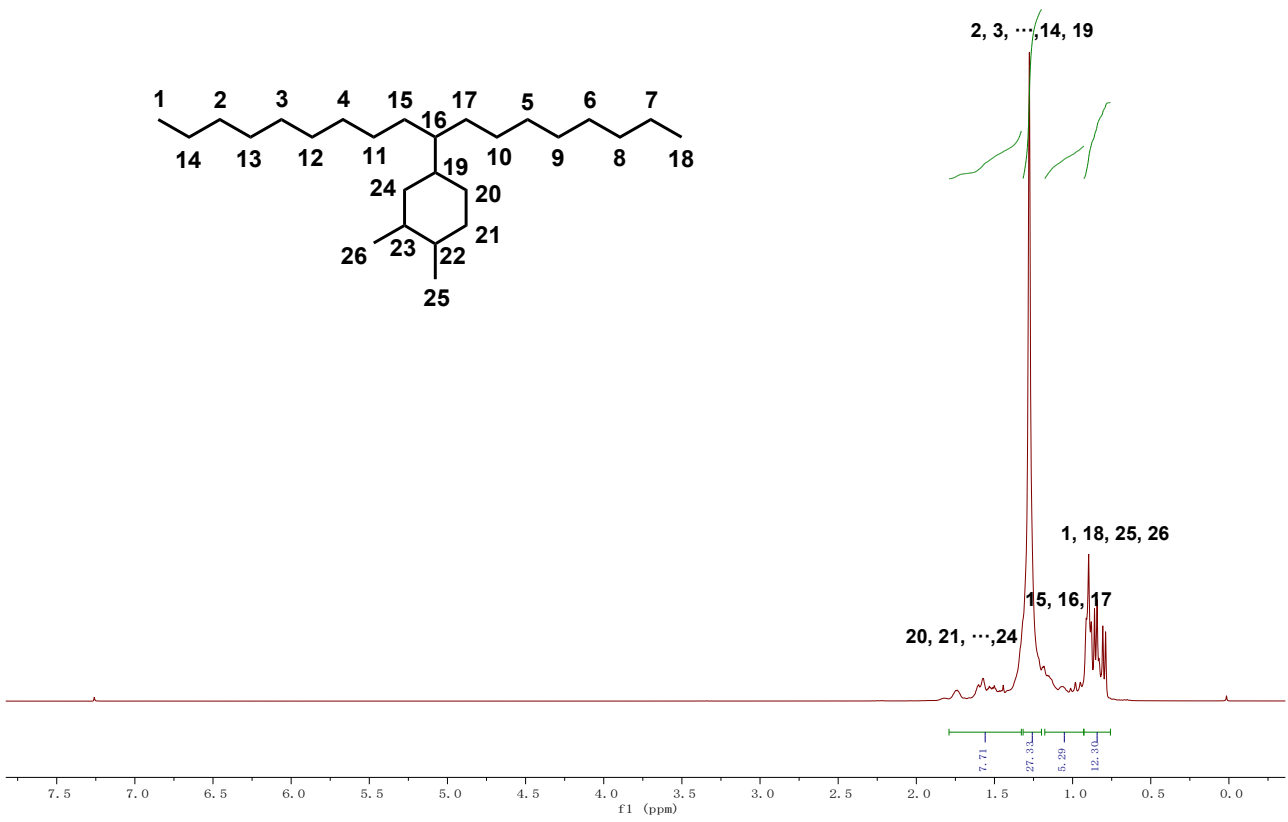

(b)

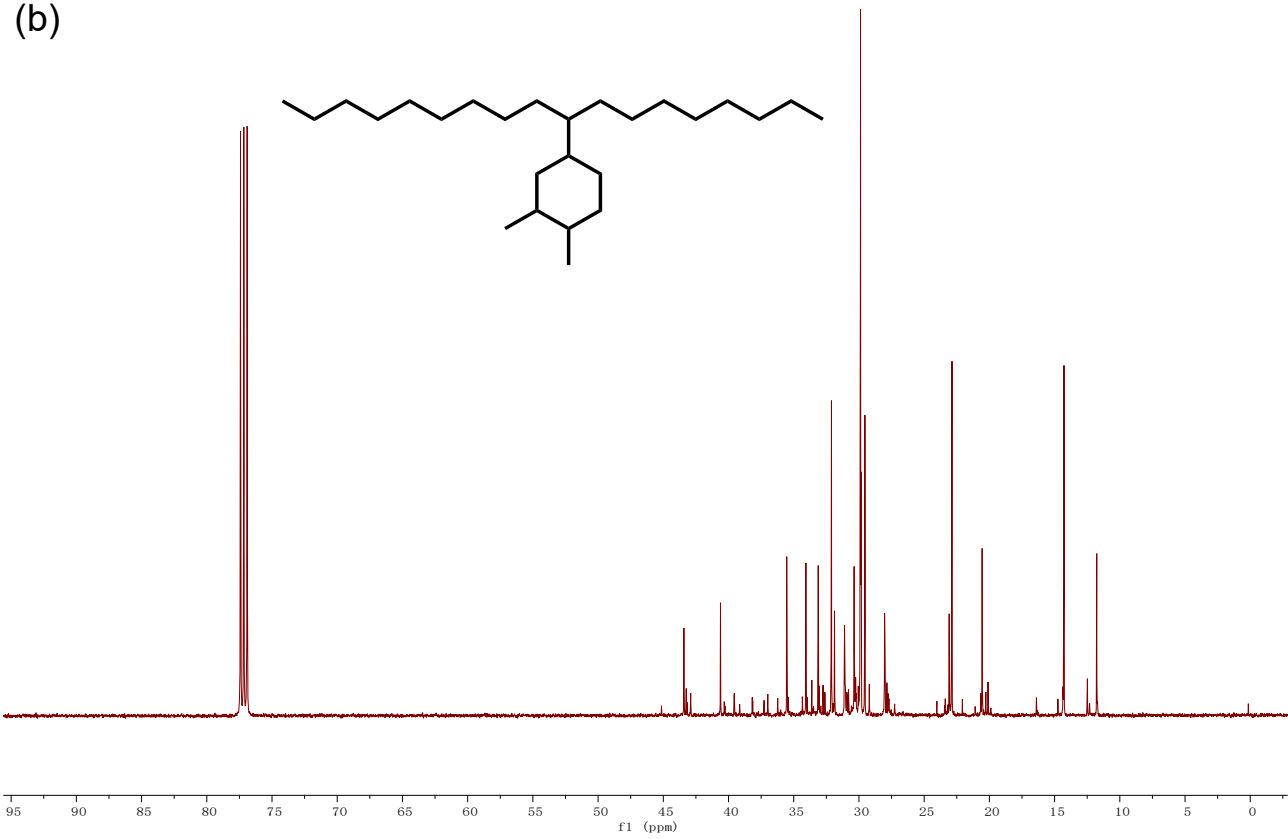

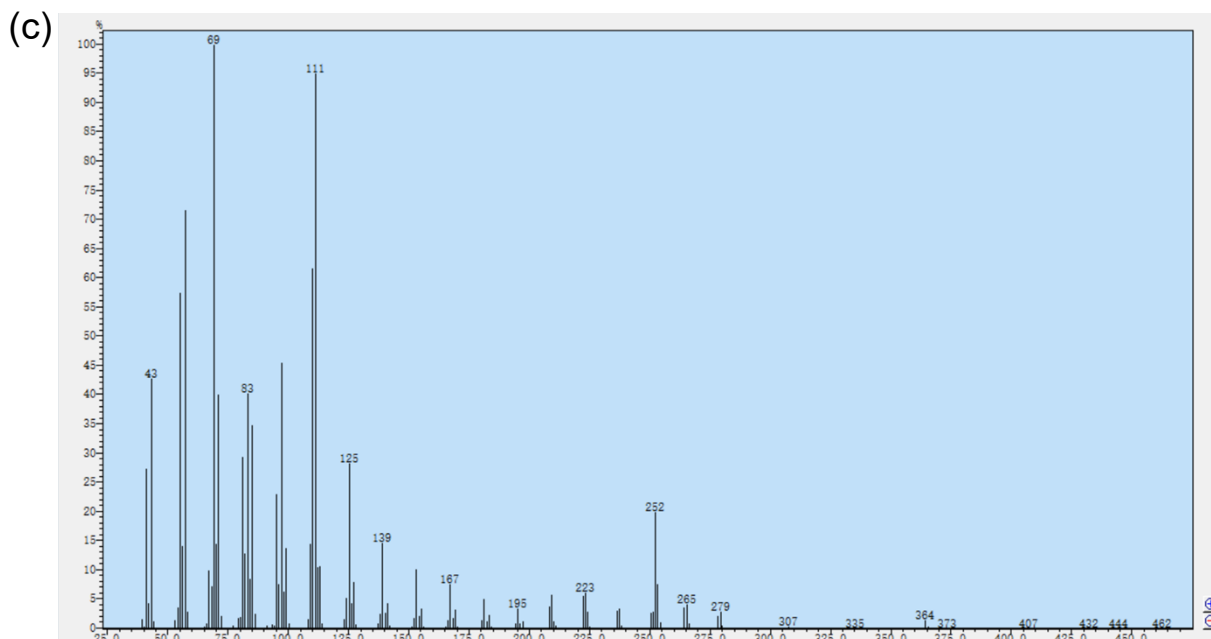

**Fig. S16** (a)  $^1\text{H}$ -NMR, (b)  $^{13}\text{C}$ -NMR, and (c) Mass spectra of  $\text{C}_{26}$  CBAL-OX.



(a)

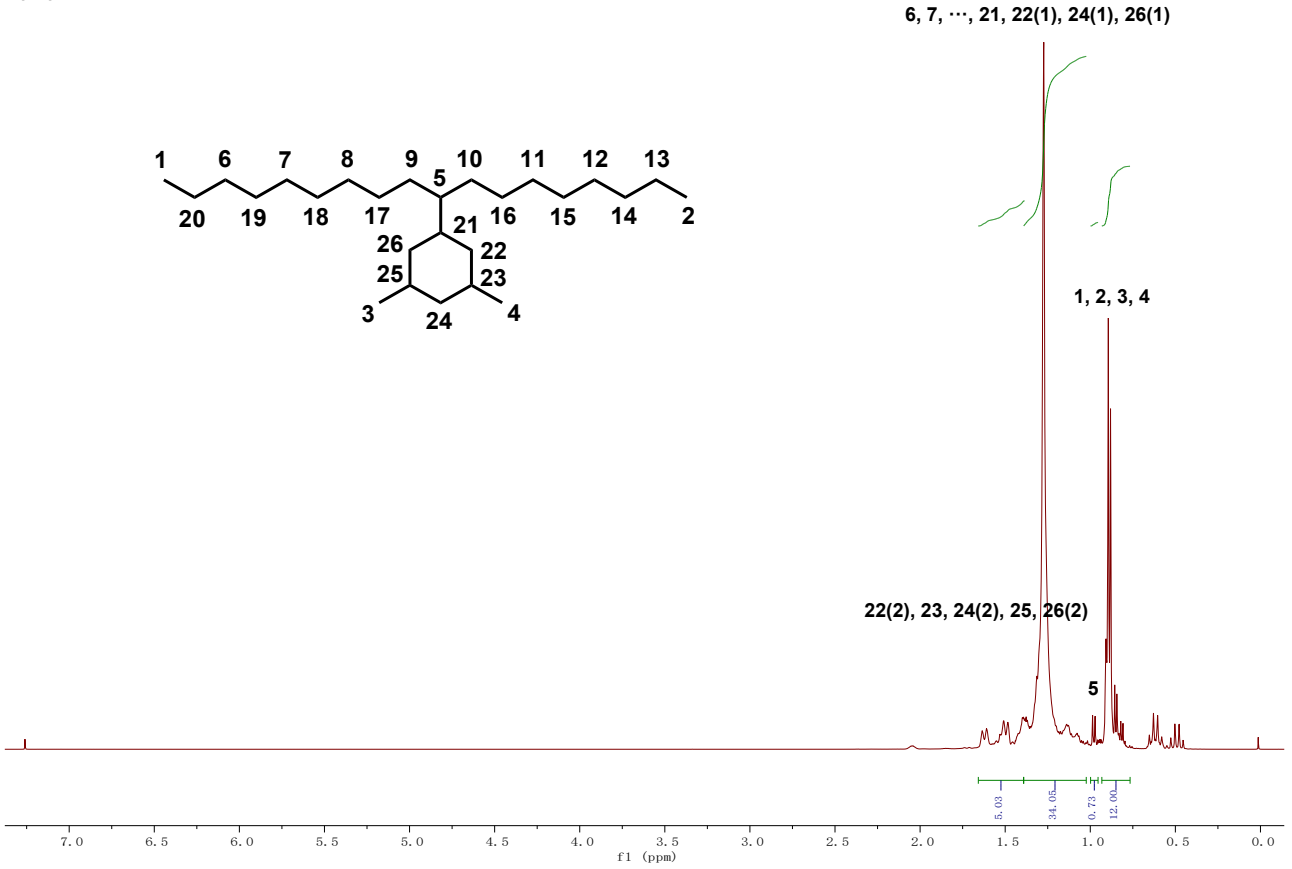

(b)

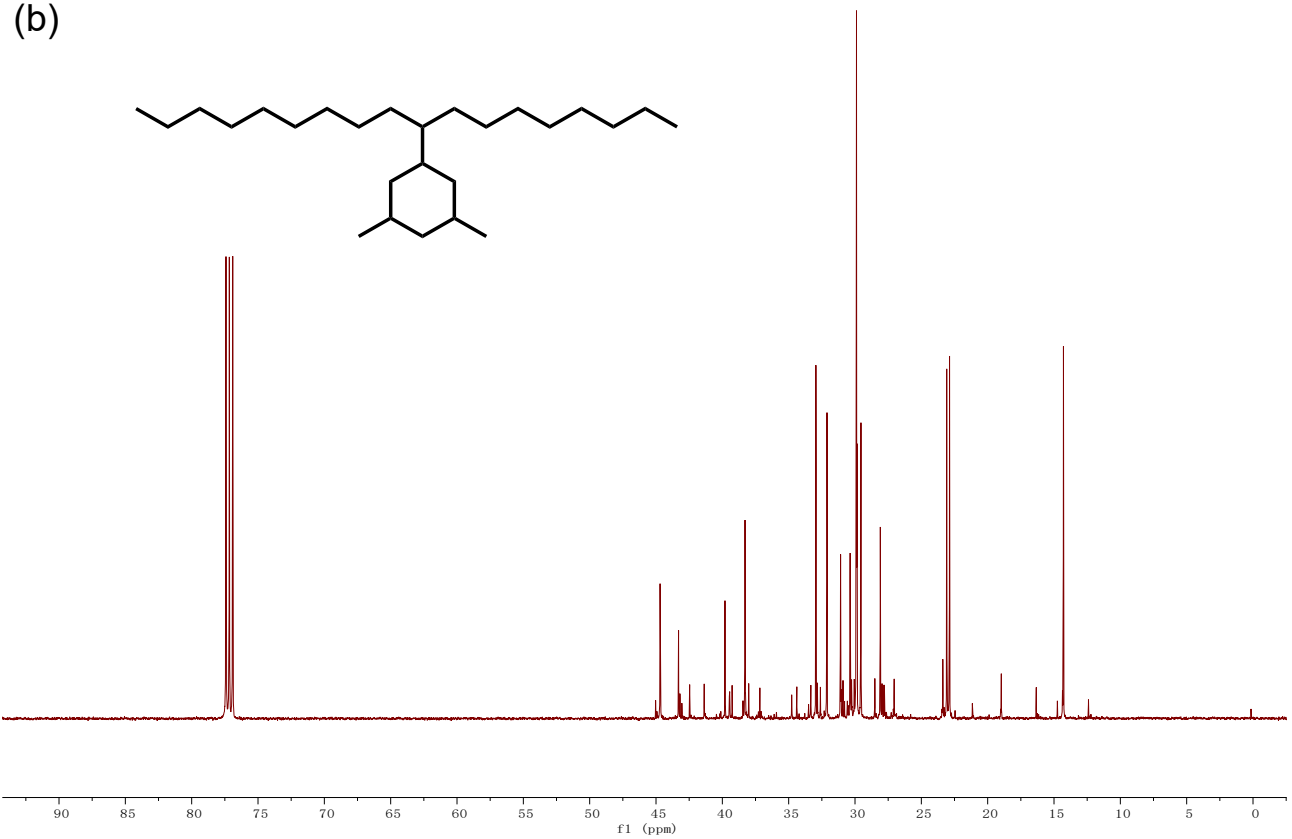

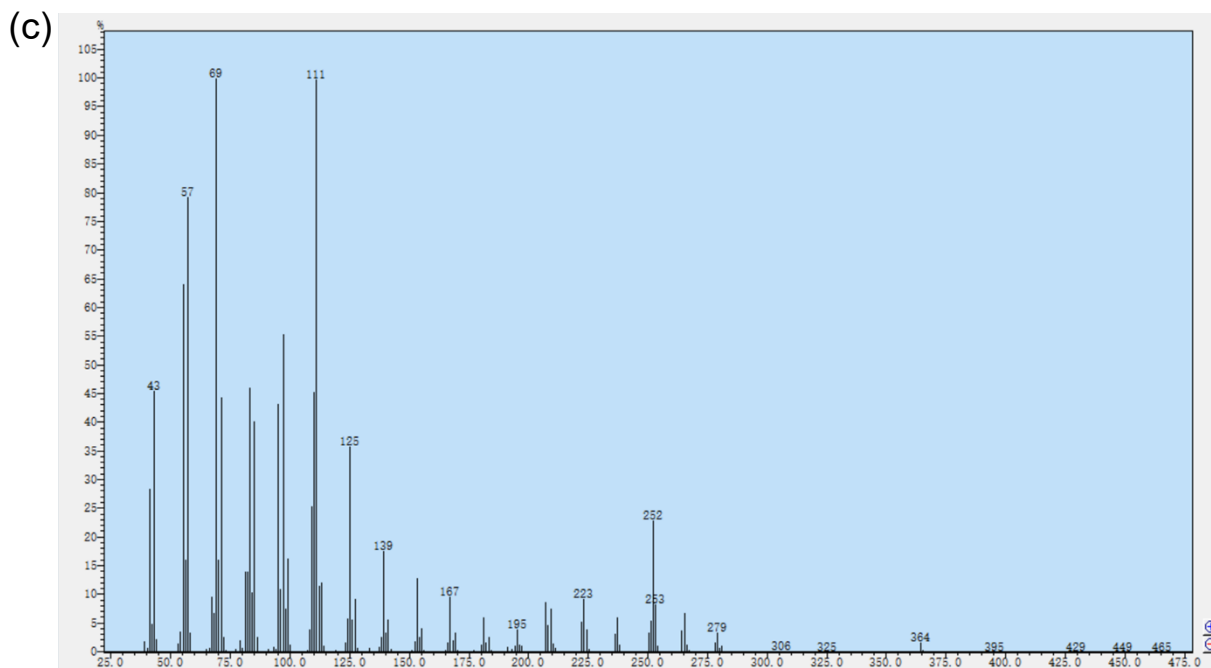

**Fig. S17** (a)  $^1\text{H}$ -NMR, (b)  $^{13}\text{C}$ -NMR, and (c) Mass spectra of  $\text{C}_{26}$  CBAL-MX.

(a)

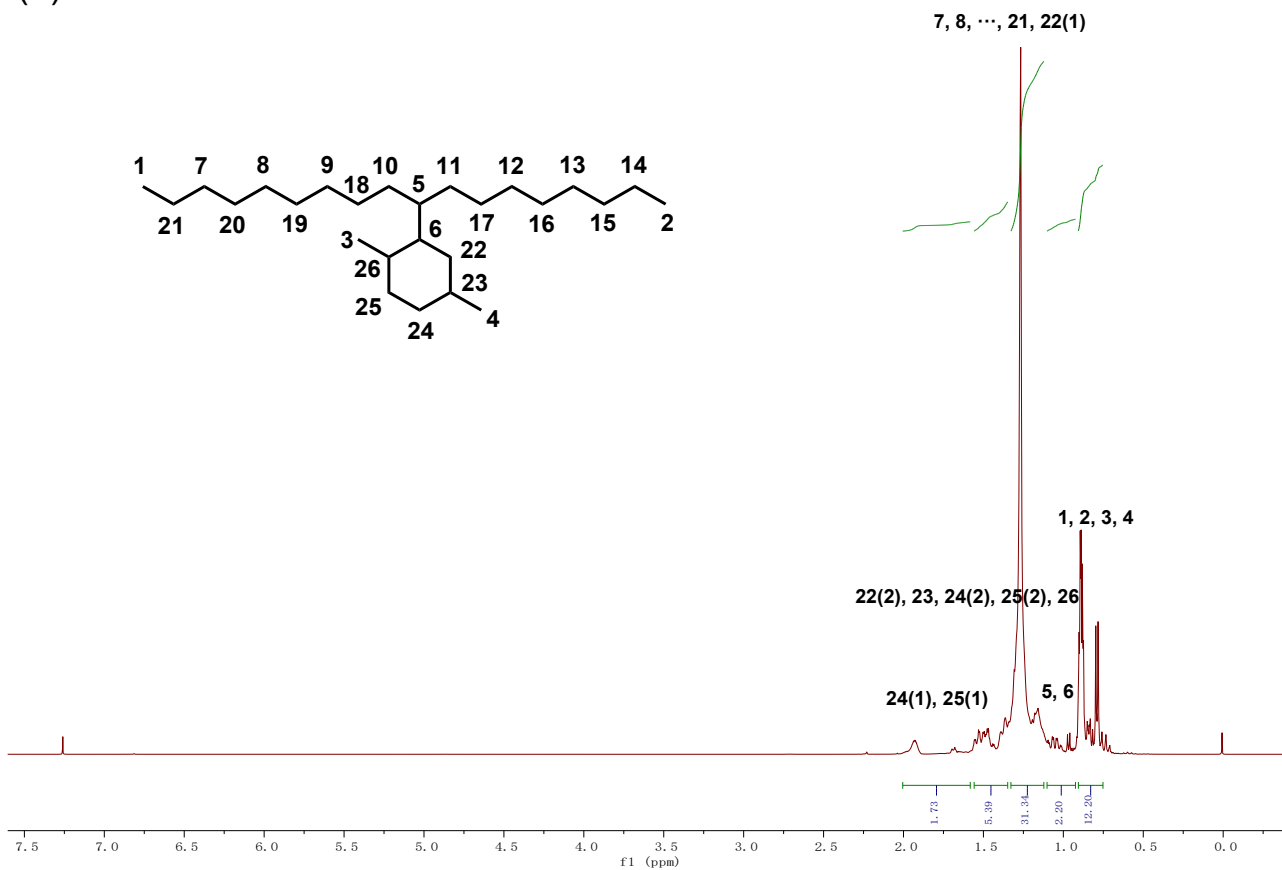

(b)

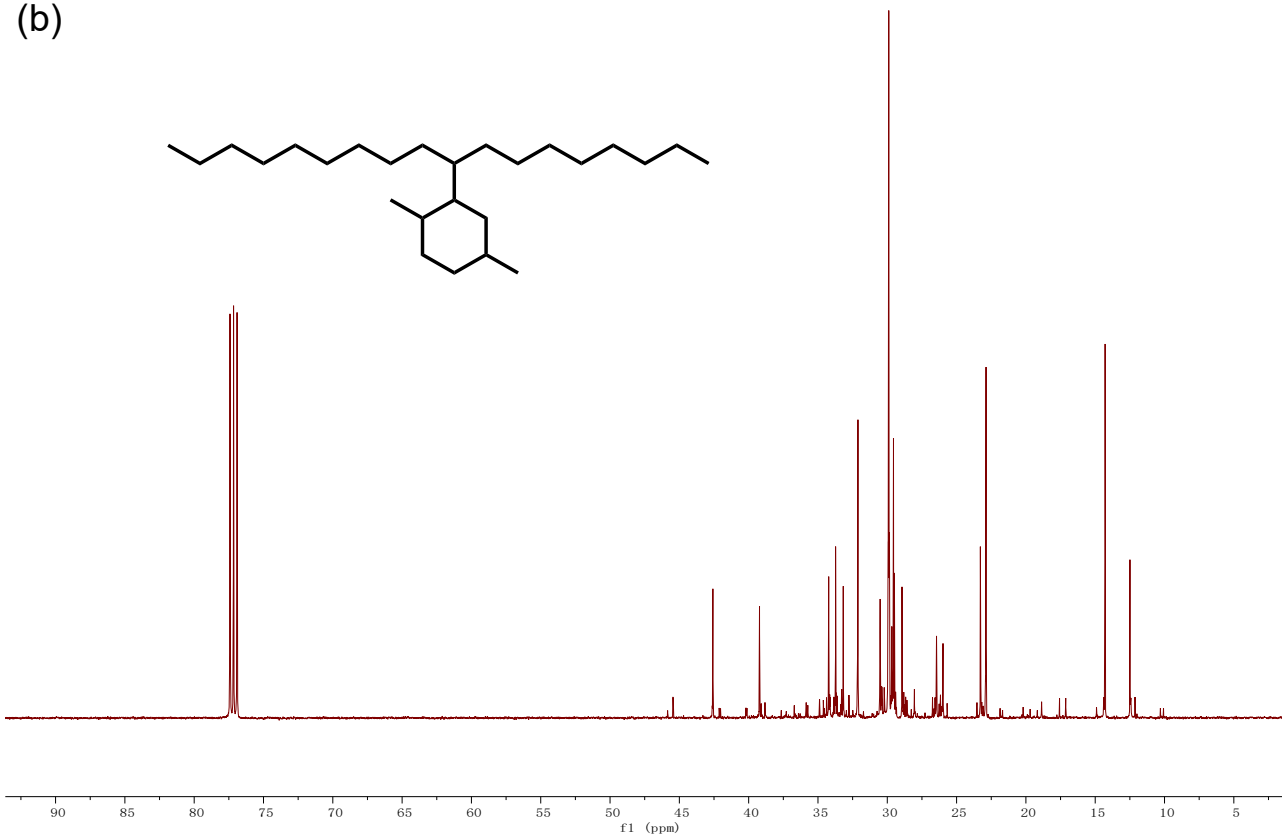

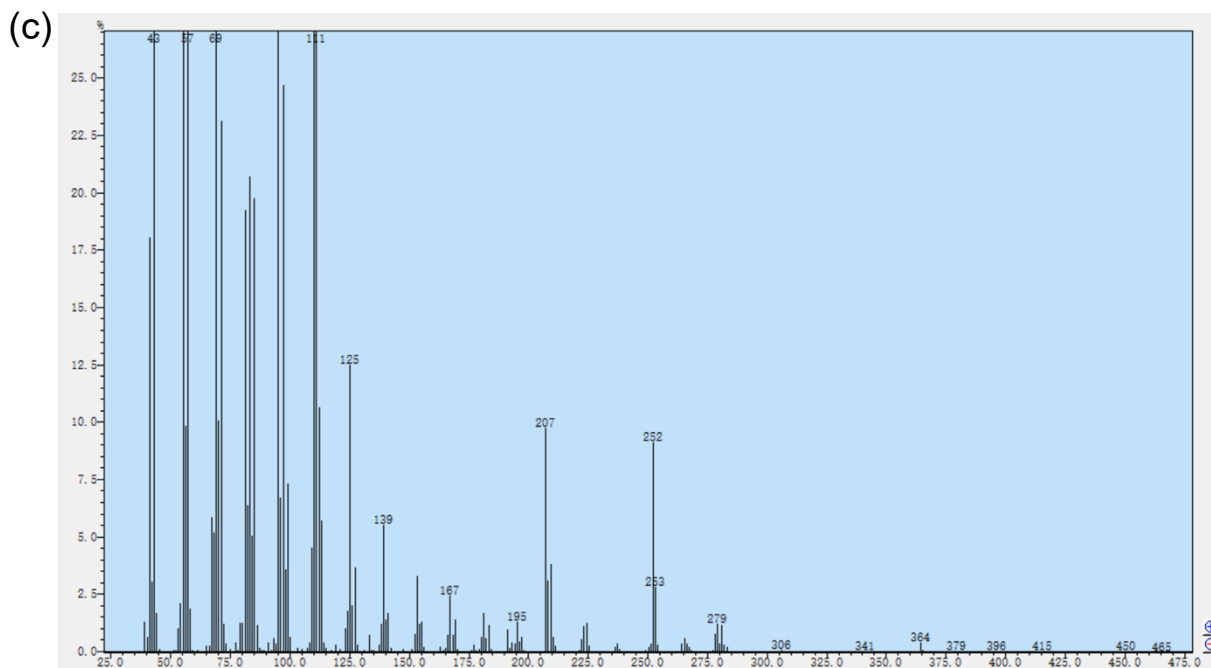

**Fig. S18** (a)  $^1\text{H}$ -NMR, (b)  $^{13}\text{C}$ -NMR, and (c) Mass spectra of  $\text{C}_{26}$  CBAL-PX.
